# Supplementary material for: Development of Novel Peptidyl Nitriles Targeting Rhodesain and Falcipain-2 for the Treatment of Sleeping Sickness and Malaria
Source: MDPI journal article supplement (doi:10.3390/ijms25084410), 2024-04-17
Supplement: s1 [file s1]

## Supplementary material

### Figure captions

**Figure S1.**  $^1\text{H}$  NMR spectrum of compound **14a**.

**Figure S2.**  $^1\text{H}$  NMR spectrum of compound **15a**.

**Figure S3.**  $^1\text{H}$  NMR spectrum of compound **16a**.

**Figure S4.**  $^1\text{H}$  NMR spectrum of compound **17a**.

**Figure S5.**  $^1\text{H}$  NMR spectrum of compound **14b**.

**Figure S6.**  $^1\text{H}$  NMR spectrum of compound **15b**.

**Figure S7.**  $^1\text{H}$  NMR spectrum of compound **16b**.

**Figure S8.**  $^1\text{H}$  NMR spectrum of compound **17b**.

**Figure S9.**  $^1\text{H}$  NMR spectrum of compound **18a**.

**Figure S10.**  $^1\text{H}$  NMR spectrum of compound **19a**.

**Figure S11.**  $^1\text{H}$  NMR spectrum of compound **20a**.

**Figure S12.**  $^1\text{H}$  NMR spectrum of compound **21a**.

**Figure S13.**  $^1\text{H}$  NMR spectrum of compound **18b**.

**Figure S14.**  $^1\text{H}$  NMR spectrum of compound **19b**.

**Figure S15.**  $^1\text{H}$  NMR spectrum of compound **20b**.

**Figure S16.**  $^1\text{H}$  NMR spectrum of compound **21b**.

**Figure S17.**  $^1\text{H}$  NMR spectrum of compound **1a**.

**Figure S18.**  $^{13}\text{C}$  NMR spectrum of compound **1a**.

**Figure S19.**  $^1\text{H}$  NMR spectrum of compound **2a**.

**Figure S20.**  $^{13}\text{C}$  NMR spectrum of compound **2a**.

**Figure S21.**  $^1\text{H}$  NMR spectrum of compound **3a**.

**Figure S22.**  $^{13}\text{C}$  NMR spectrum of compound **3a**.

**Figure S23.**  $^1\text{H}$  NMR spectrum of compound **4a**.

**Figure S24.**  $^{13}\text{C}$  NMR spectrum of compound **4a**.

**Figure S25.**  $^1\text{H}$  NMR spectrum of compound **1b**.

**Figure S26.**  $^{13}\text{C}$  NMR spectrum of compound **1b**.

**Figure S27.**  $^1\text{H}$  NMR spectrum of compound **2b**.

**Figure S28.**  $^{13}\text{C}$  NMR spectrum of compound **2b**.

**Figure S29.**  $^1\text{H}$  NMR spectrum of compound **3b**.

**Figure S30.**  $^{13}\text{C}$  NMR spectrum of compound **3b**.

**Figure S31.**  $^1\text{H}$  NMR spectrum of compound **4b**.

**Figure S32.**  $^{13}\text{C}$  NMR spectrum of compound **4b**.

**Figure S33.**  $^1\text{H}$  NMR spectrum of compound **5a**.

**Figure S34.**  $^{13}\text{C}$  NMR spectrum of compound **5a**.

**Figure S35.**  $^1\text{H}$  NMR spectrum of compound **6a**.

**Figure S36.**  $^{13}\text{C}$  NMR spectrum of compound **6a**.

**Figure S37.**  $^1\text{H}$  NMR spectrum of compound **7a**.

**Figure S38.**  $^{13}\text{C}$  NMR spectrum of compound **7a**.

**Figure S39.**  $^1\text{H}$  NMR spectrum of compound **8a**.

**Figure S40.**  $^{13}\text{C}$  NMR spectrum of compound **8a**.

**Figure S41.**  $^1\text{H}$  NMR spectrum of compound **5b**.

**Figure S42.**  $^{13}\text{C}$  NMR spectrum of compound **5b**.

**Figure S43.**  $^1\text{H}$  NMR spectrum of compound **6b**.

**Figure S44.**  $^{13}\text{C}$  NMR spectrum of compound **6b**.

**Figure S45.**  $^1\text{H}$  NMR spectrum of compound **7b**.

**Figure S46.**  $^{13}\text{C}$  NMR spectrum of compound **7b**.

**Figure S47.**  $^1\text{H}$  NMR spectrum of compound **8b**.

**Figure S48.**  $^{13}\text{C}$  NMR spectrum of compound **8b**.

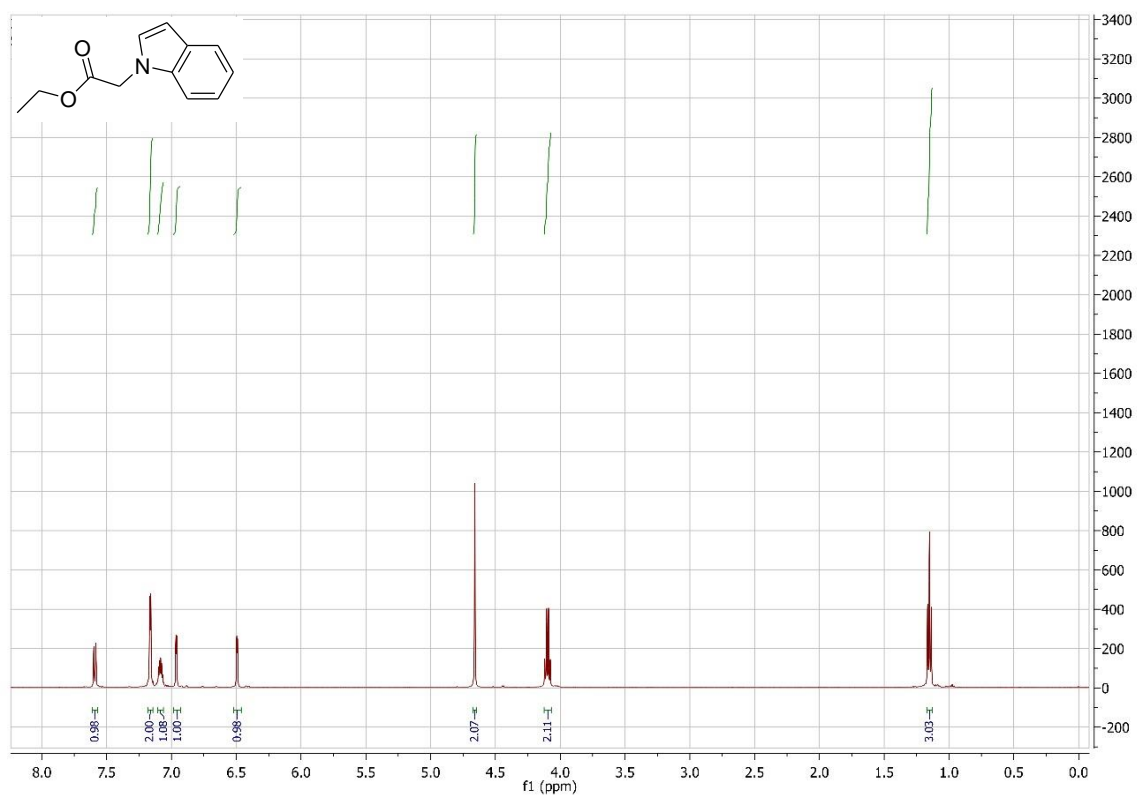

**Figure S1.** <sup>1</sup>H NMR spectrum of compound 14a.

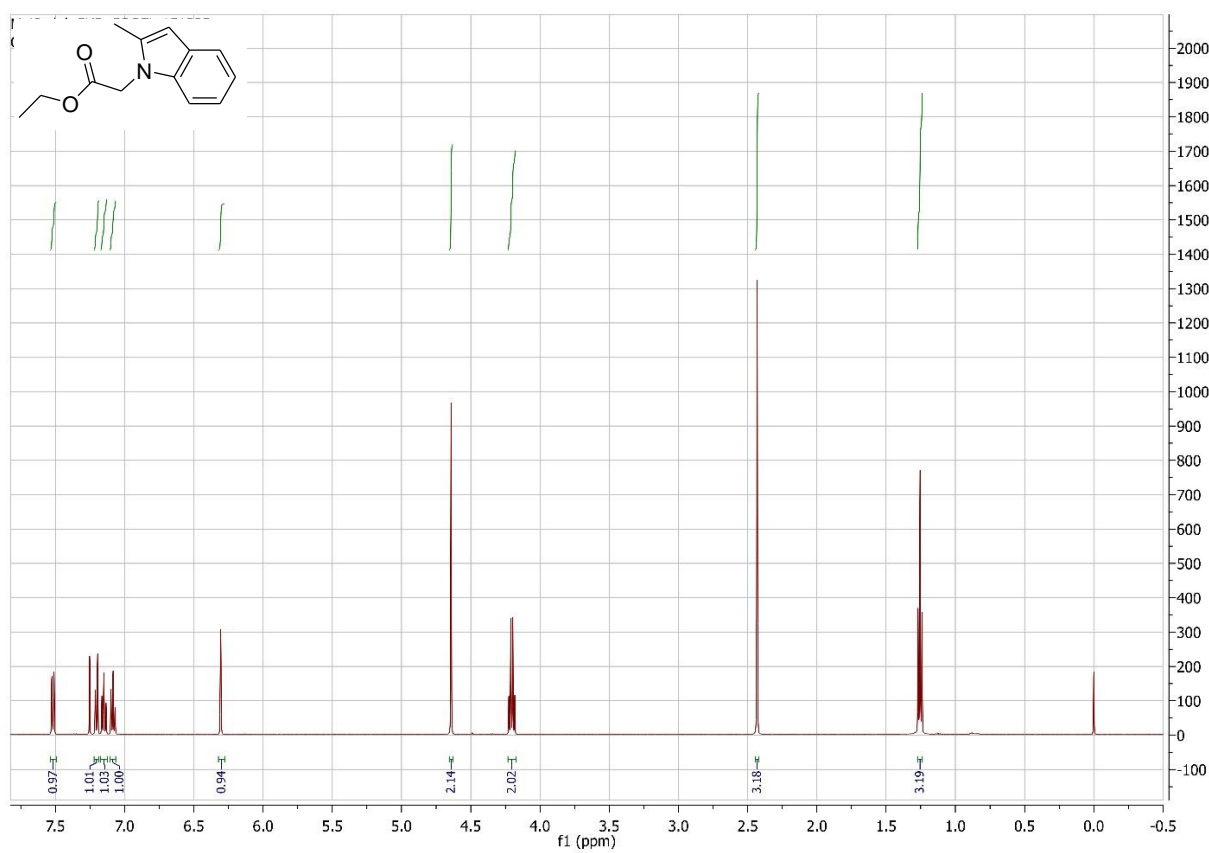

**Figure S2.** <sup>1</sup>H NMR spectrum of compound 15a.

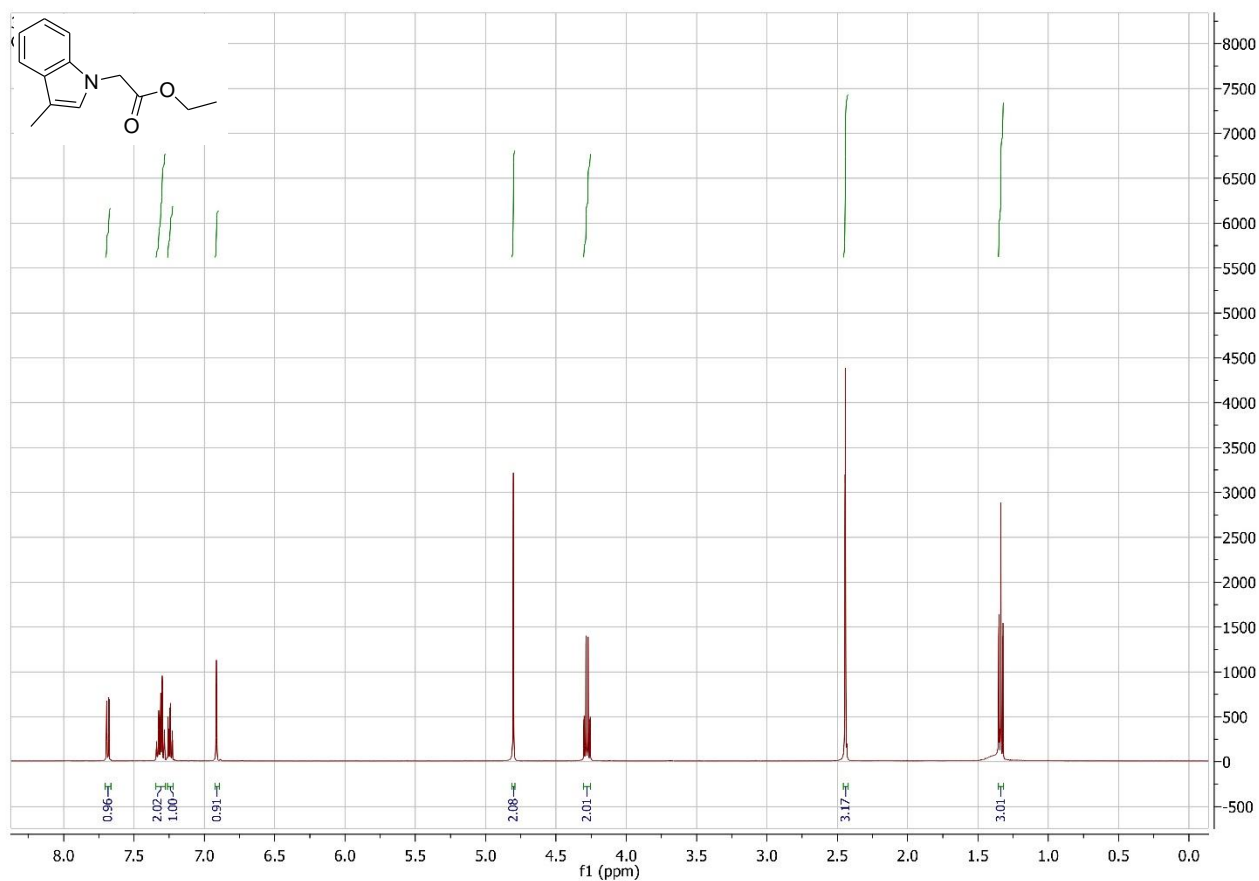

**Figure S3.** <sup>1</sup>H NMR spectrum of compound **16a**.

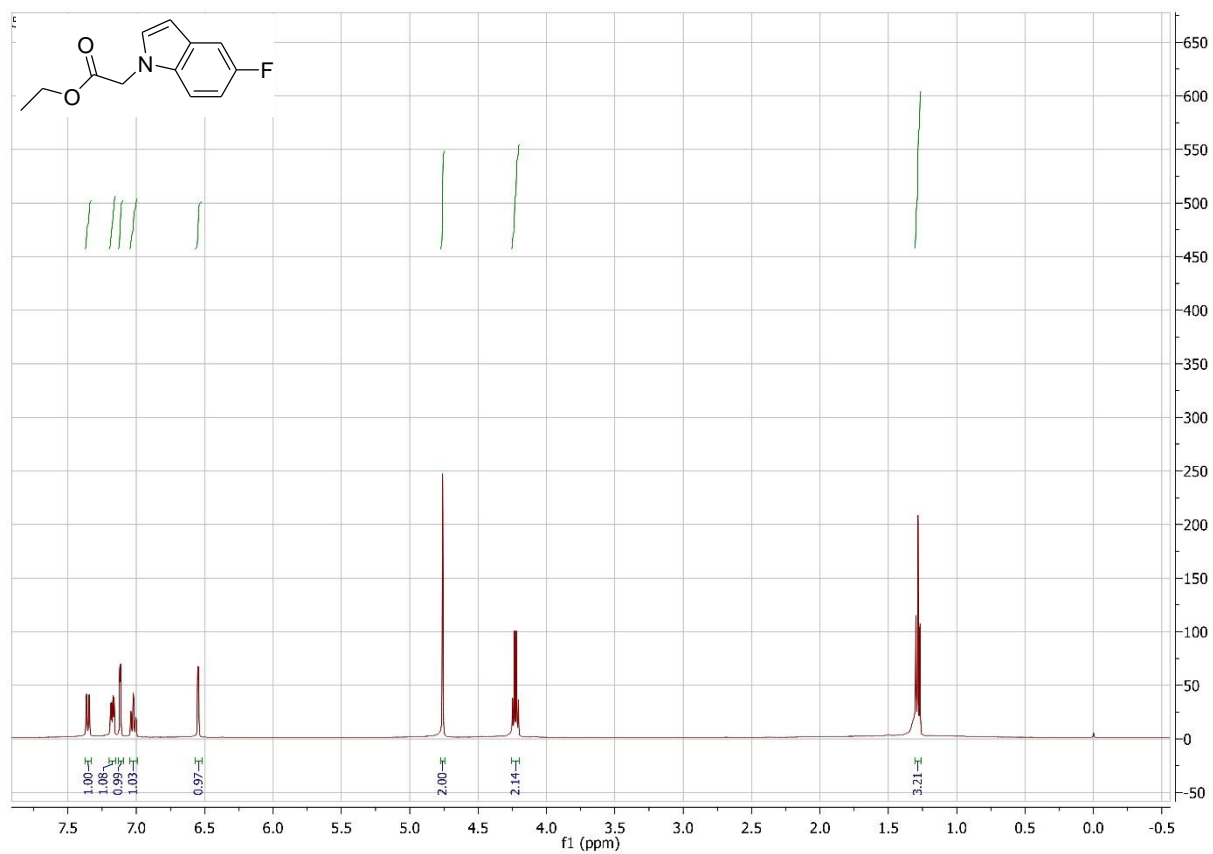

**Figure S4.** <sup>1</sup>H NMR spectrum of compound **17a**.

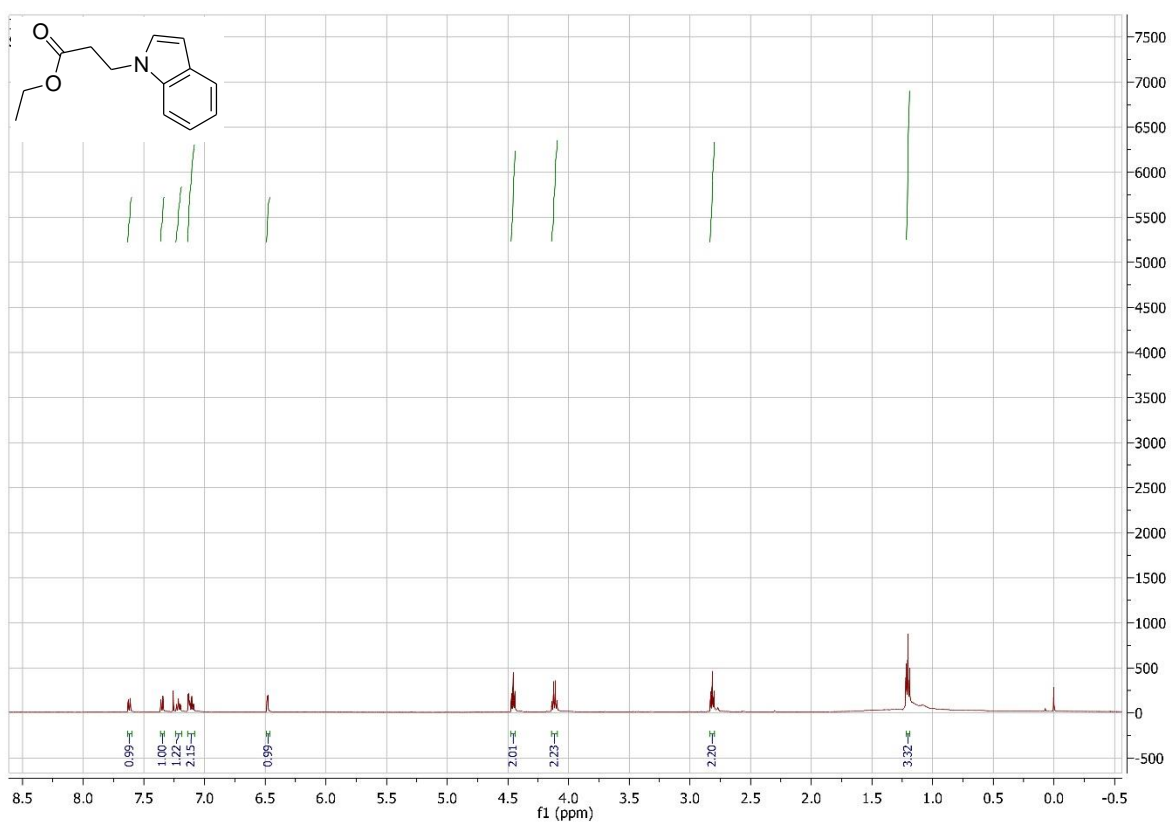

**Figure S5.** <sup>1</sup>H NMR spectrum of compound **14b**.

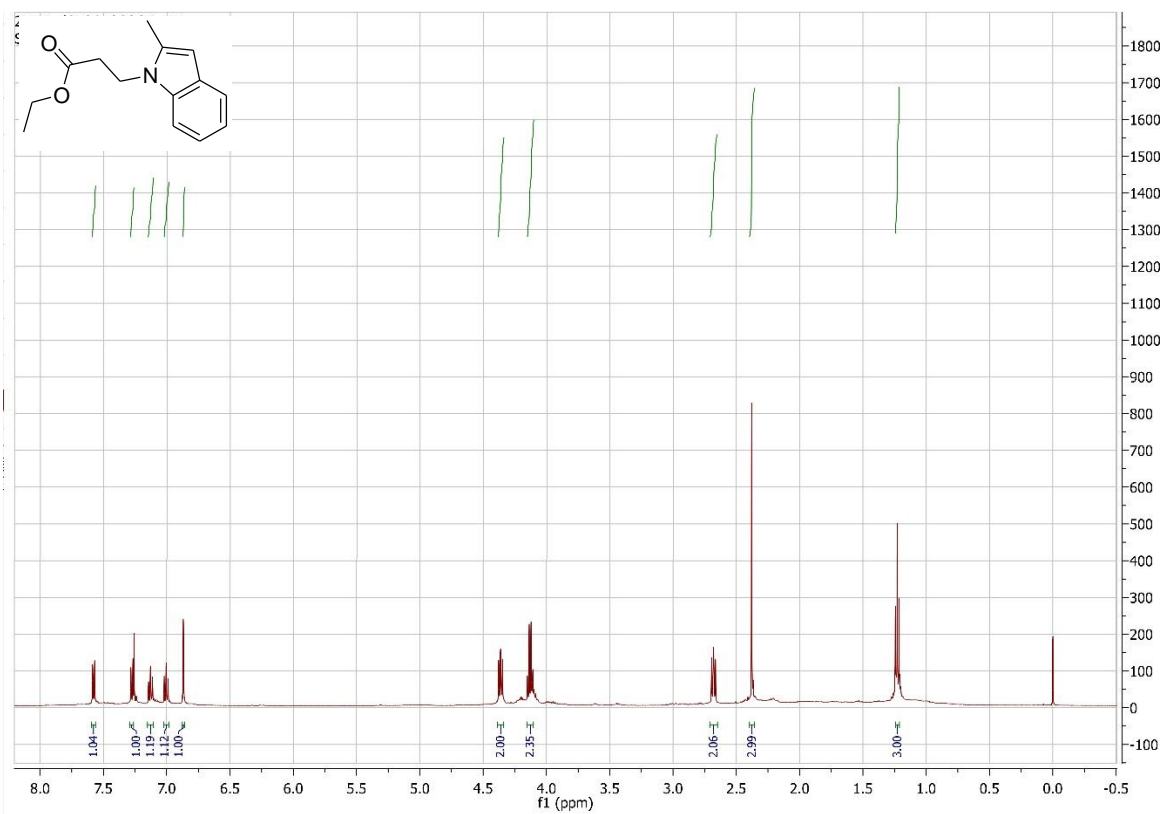

**Figure S6.** <sup>1</sup>H NMR spectrum of compound **15b**.

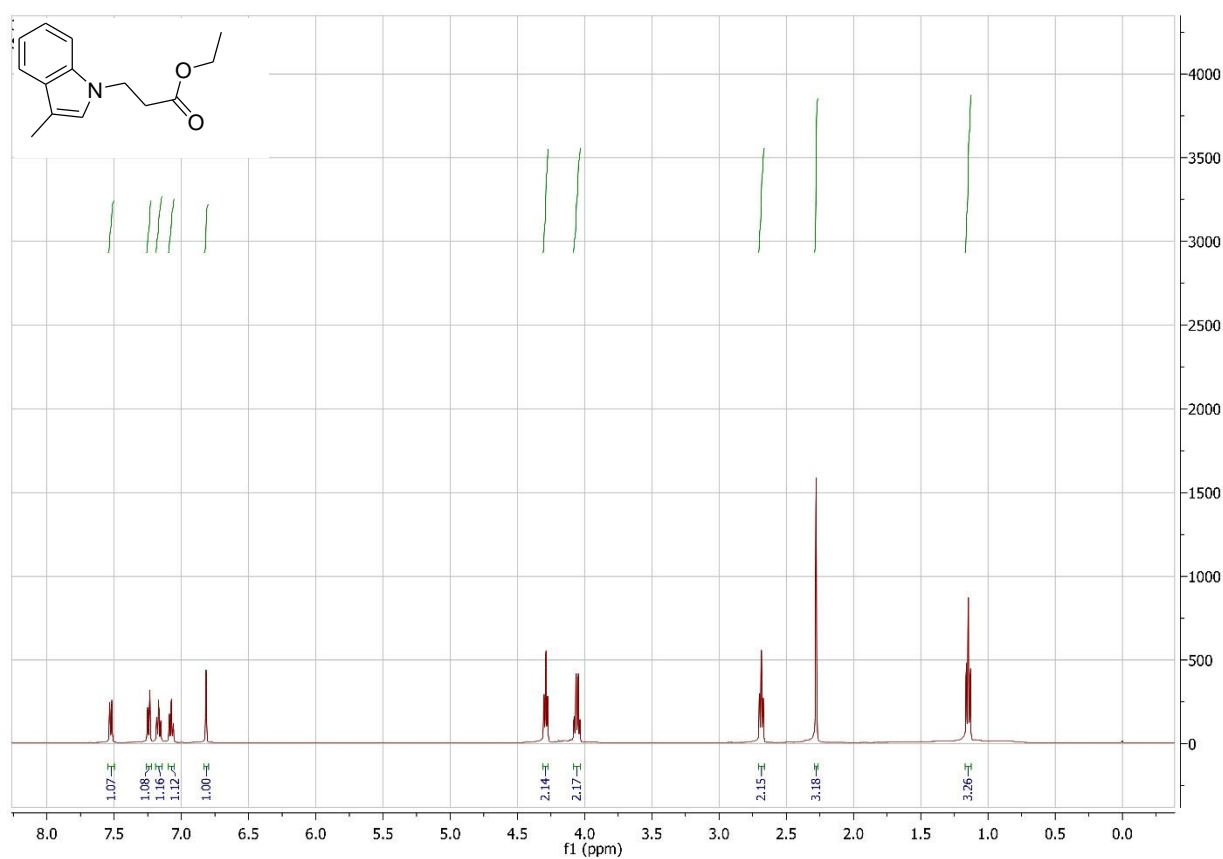

Figure S7. <sup>1</sup>H NMR spectrum of compound 16b.

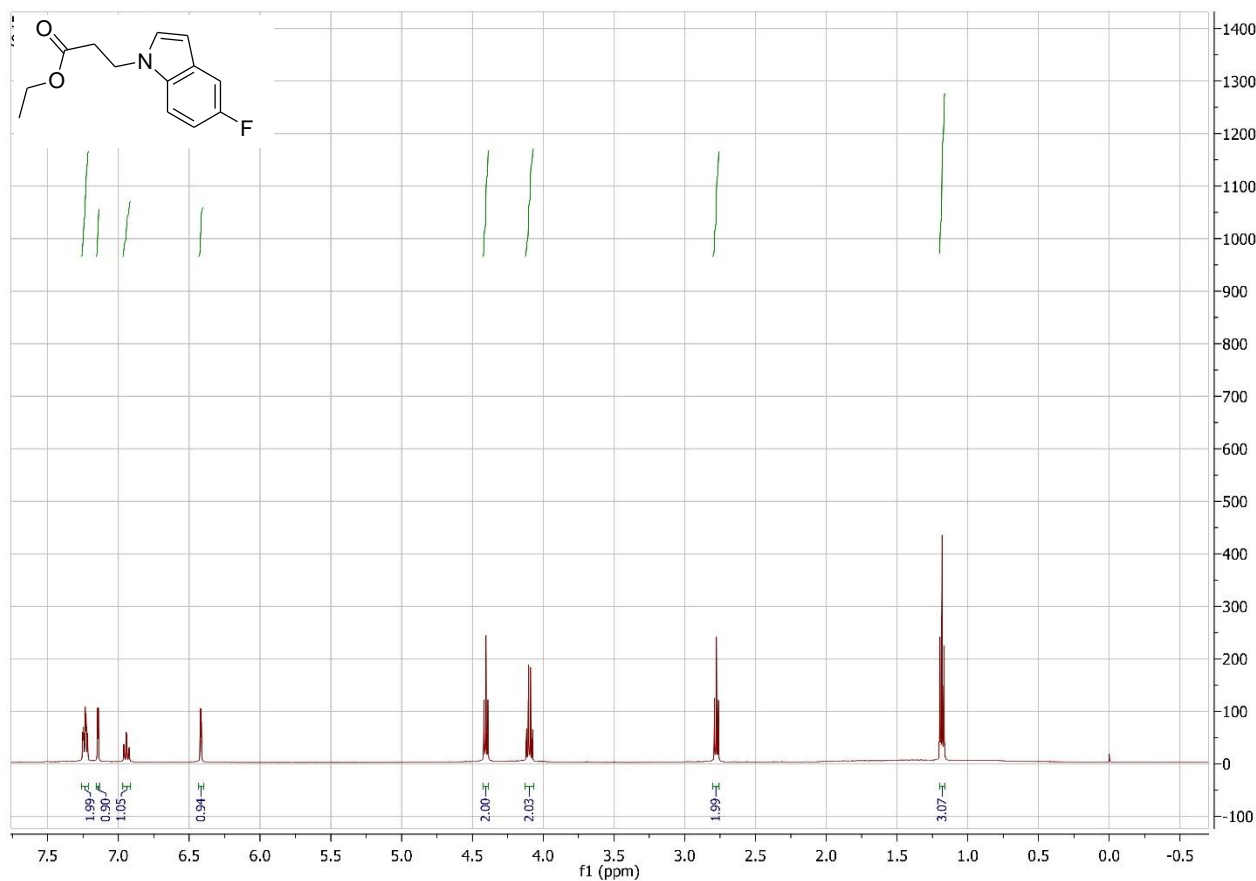

Figure S8. <sup>1</sup>H NMR spectrum of compound 17b.

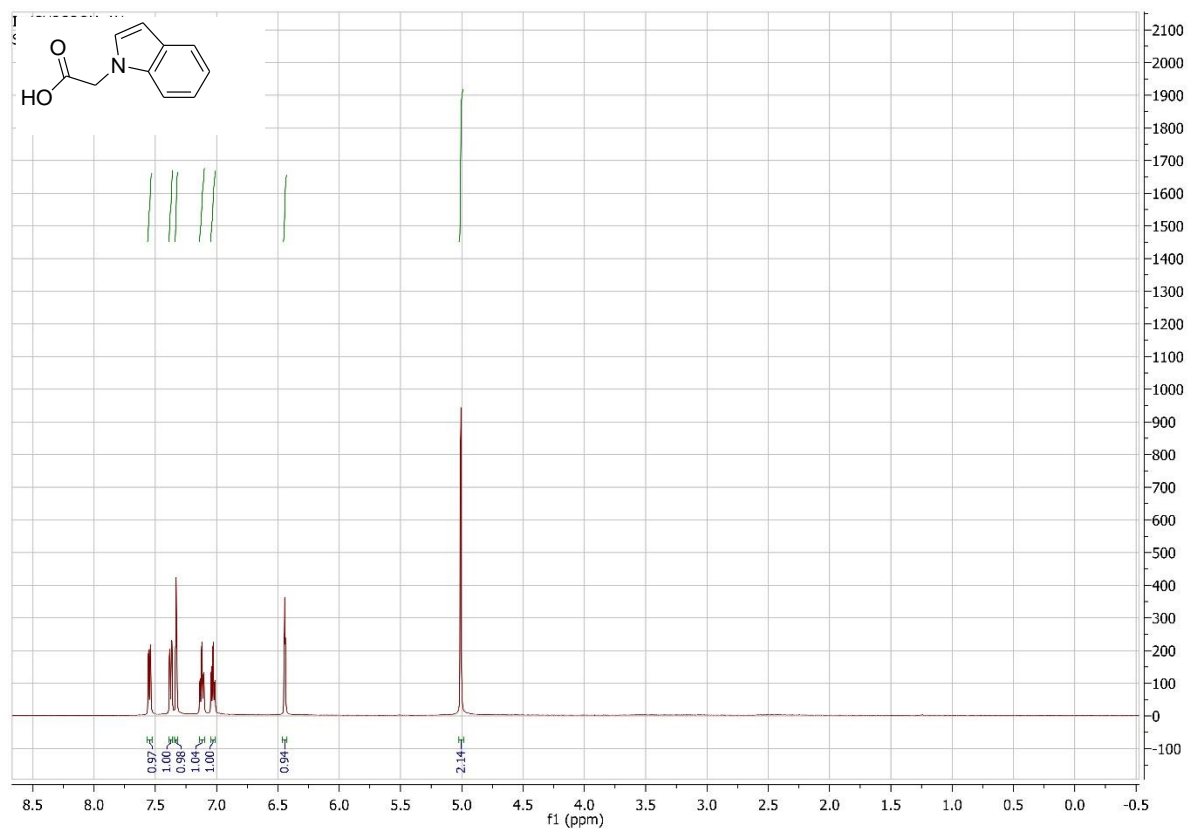

**Figure S9.** <sup>1</sup>H NMR spectrum of compound **18a**.

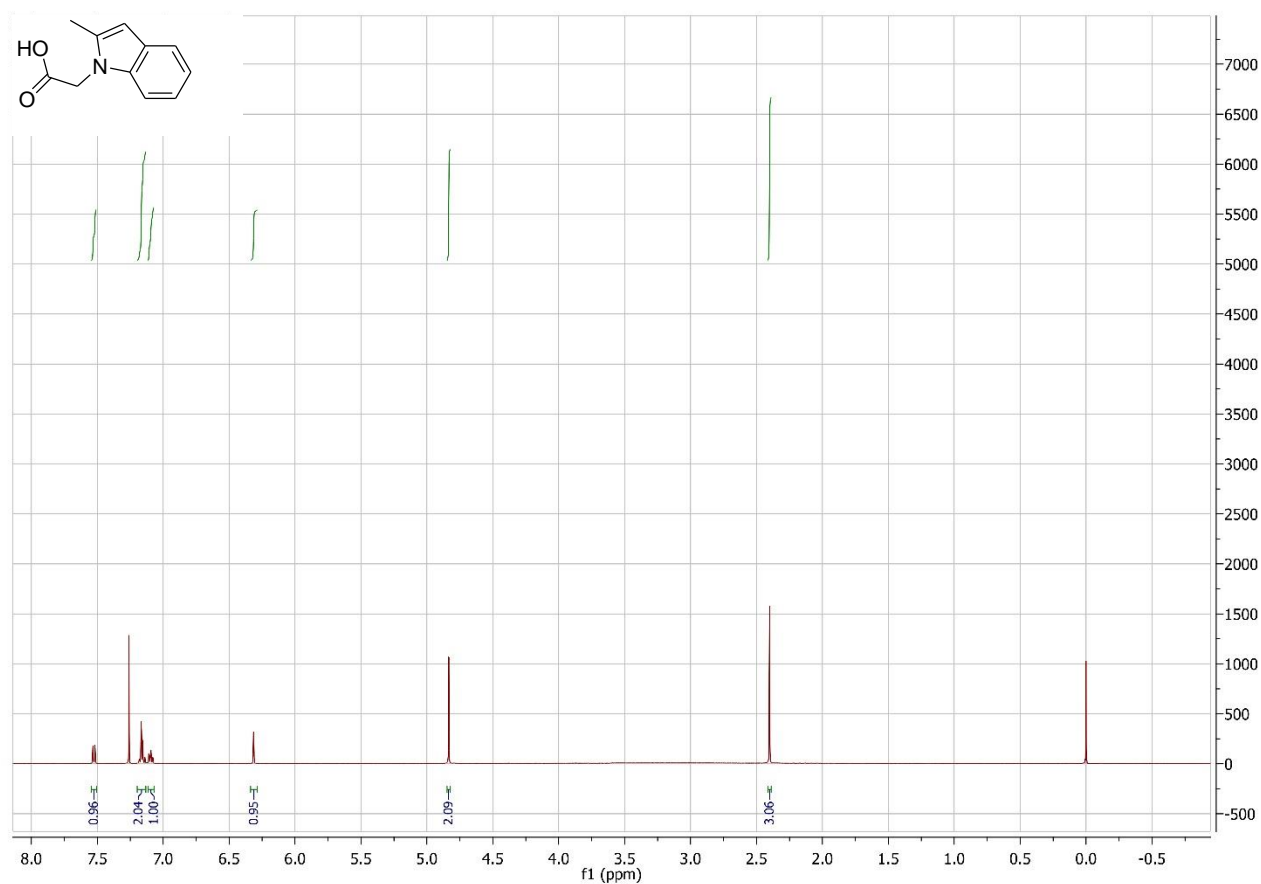

**Figure S10.** <sup>1</sup>H NMR spectrum of compound **19a**.

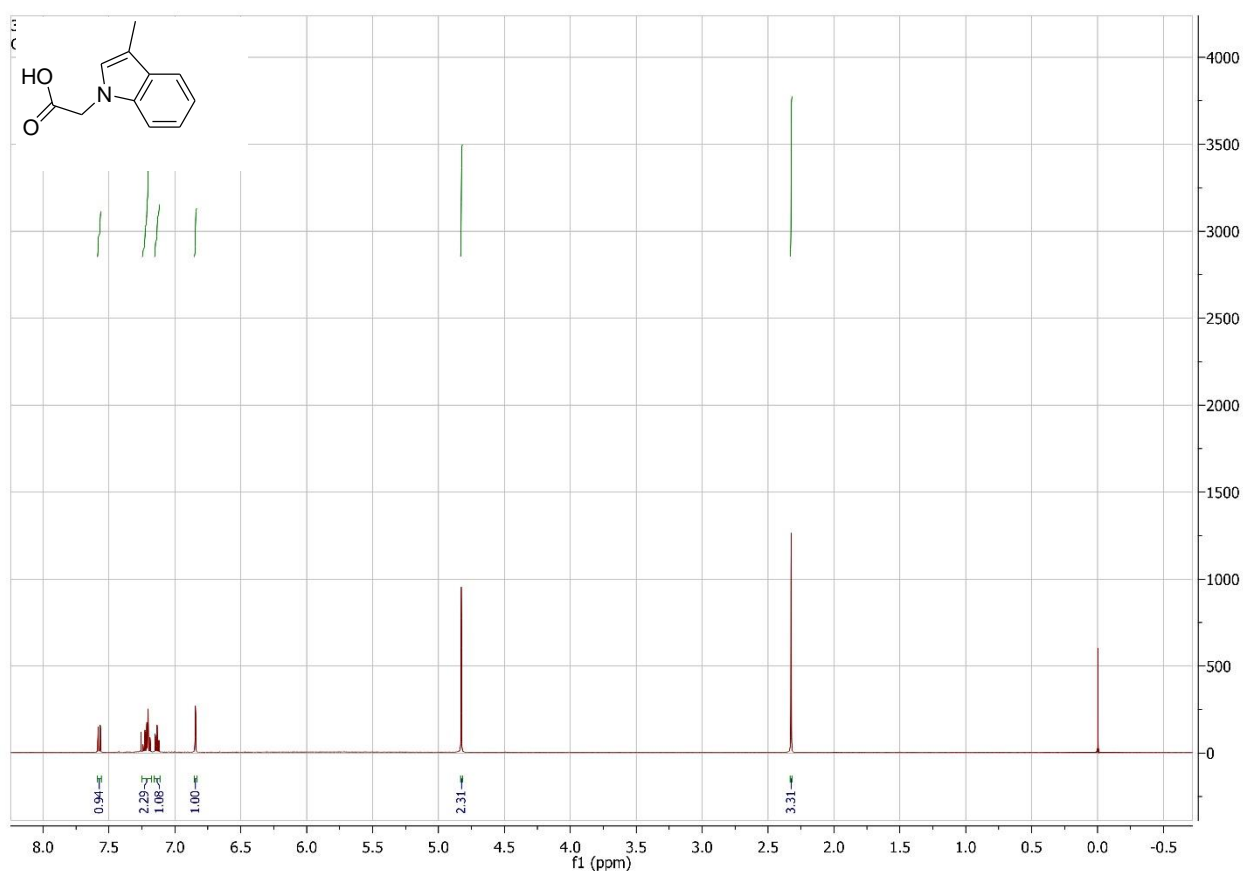

**Figure S11.** <sup>1</sup>H NMR spectrum of compound **20a**.

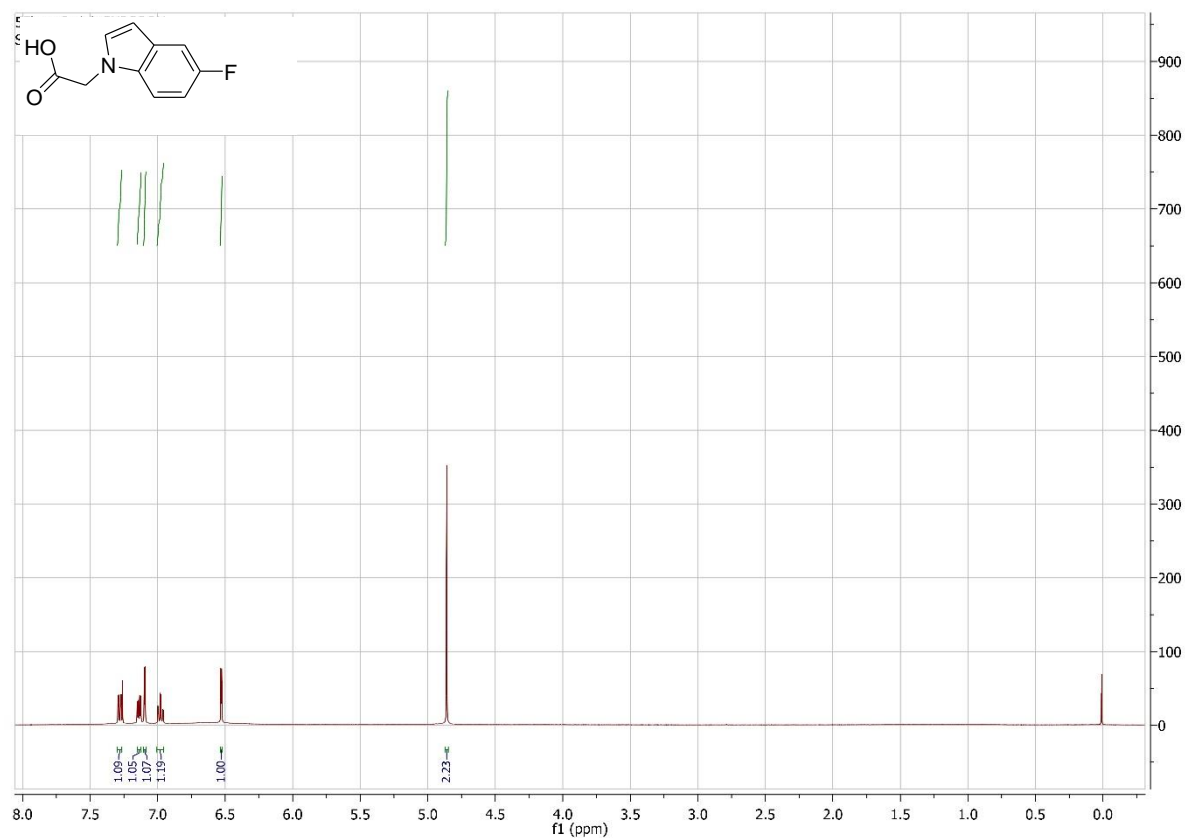

**Figure S12.** <sup>1</sup>H NMR spectrum of compound **21a**.



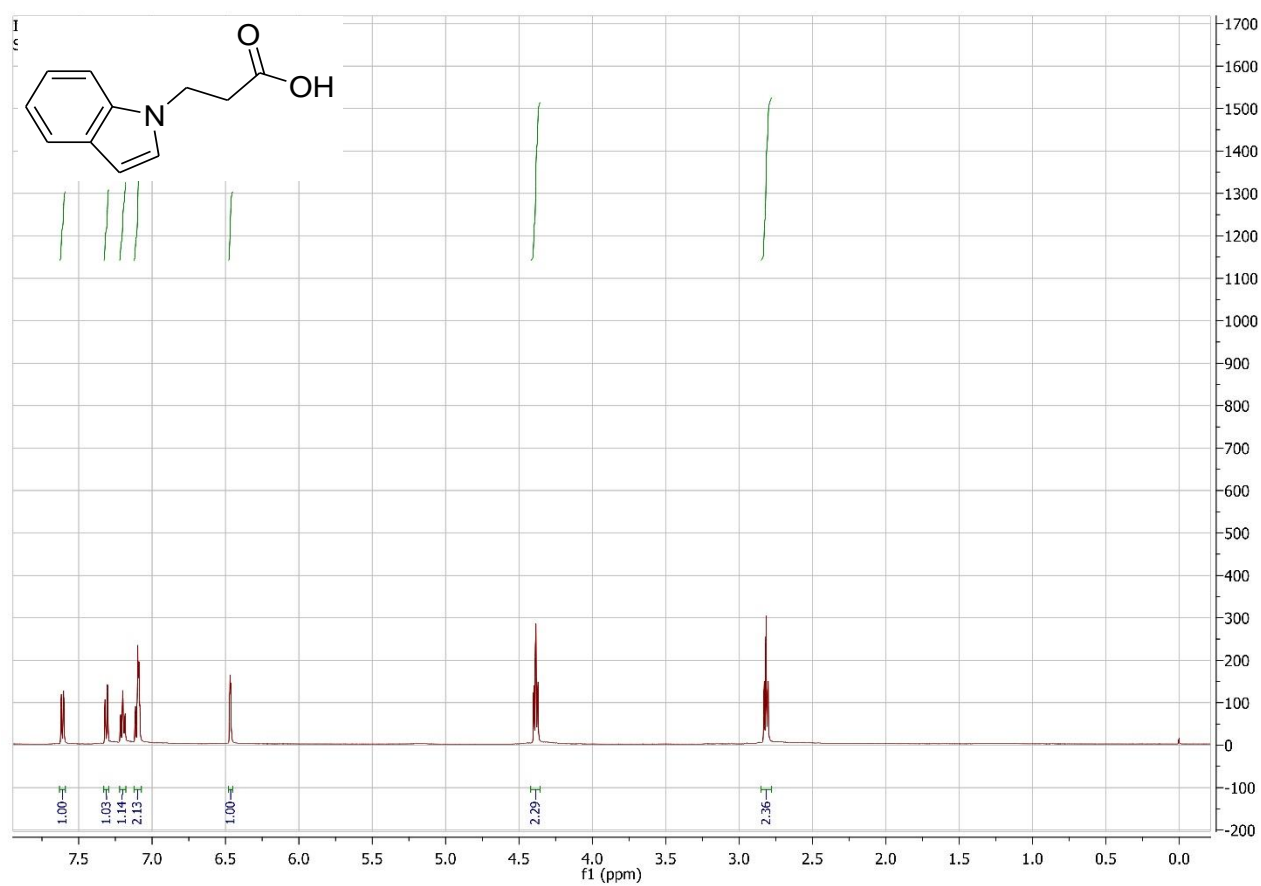

**Figure S13.** <sup>1</sup>H NMR spectrum of compound **18b**.

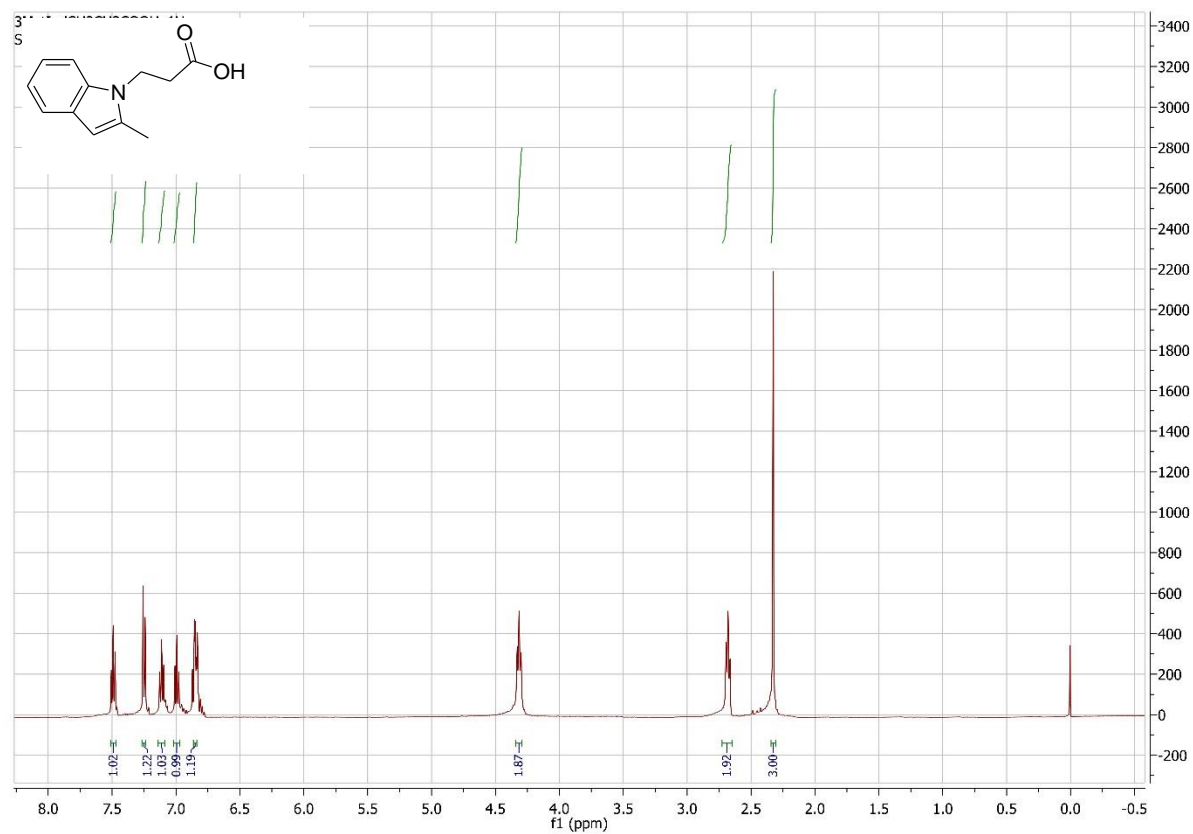

**Figure S14.** <sup>1</sup>H NMR spectrum of compound **19b**.

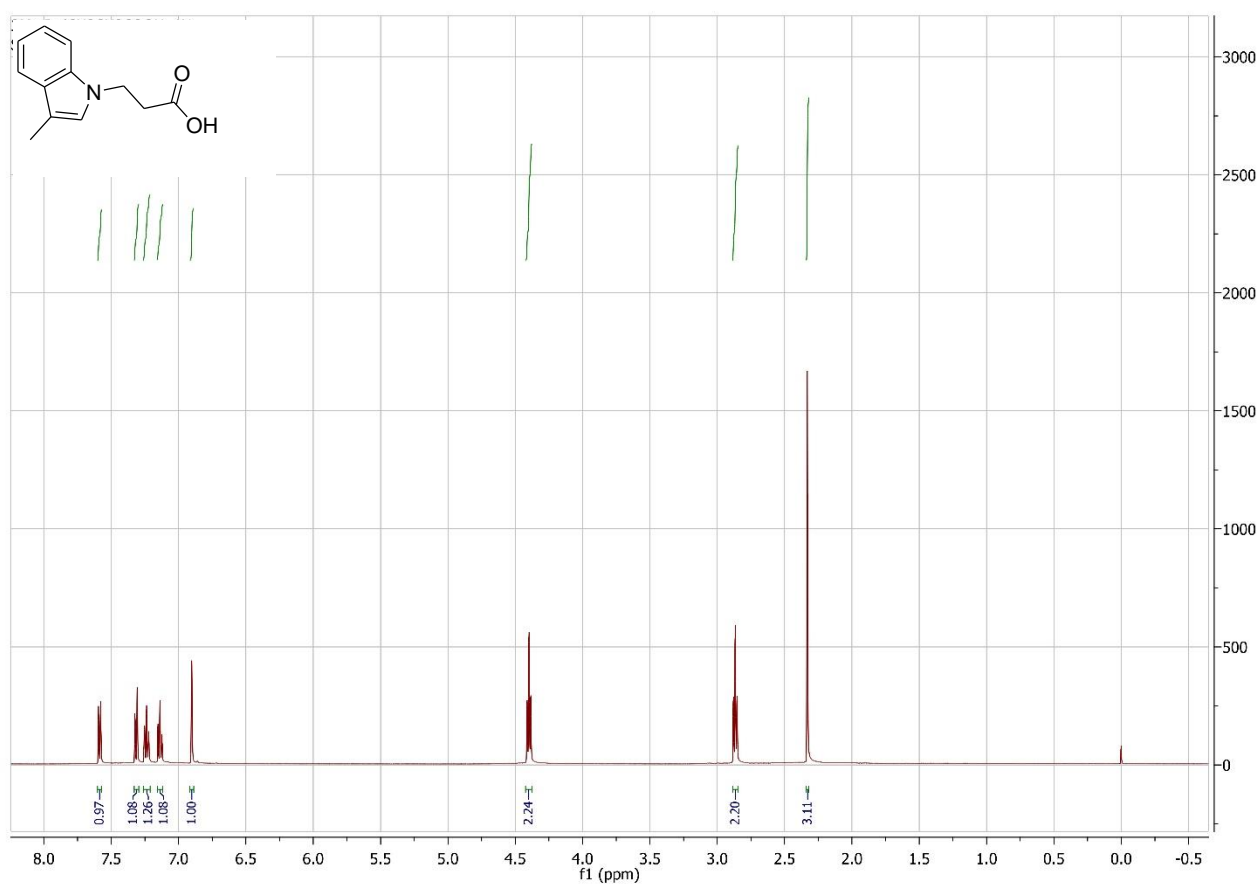

Figure S15. <sup>1</sup>H NMR spectrum of compound 20b.

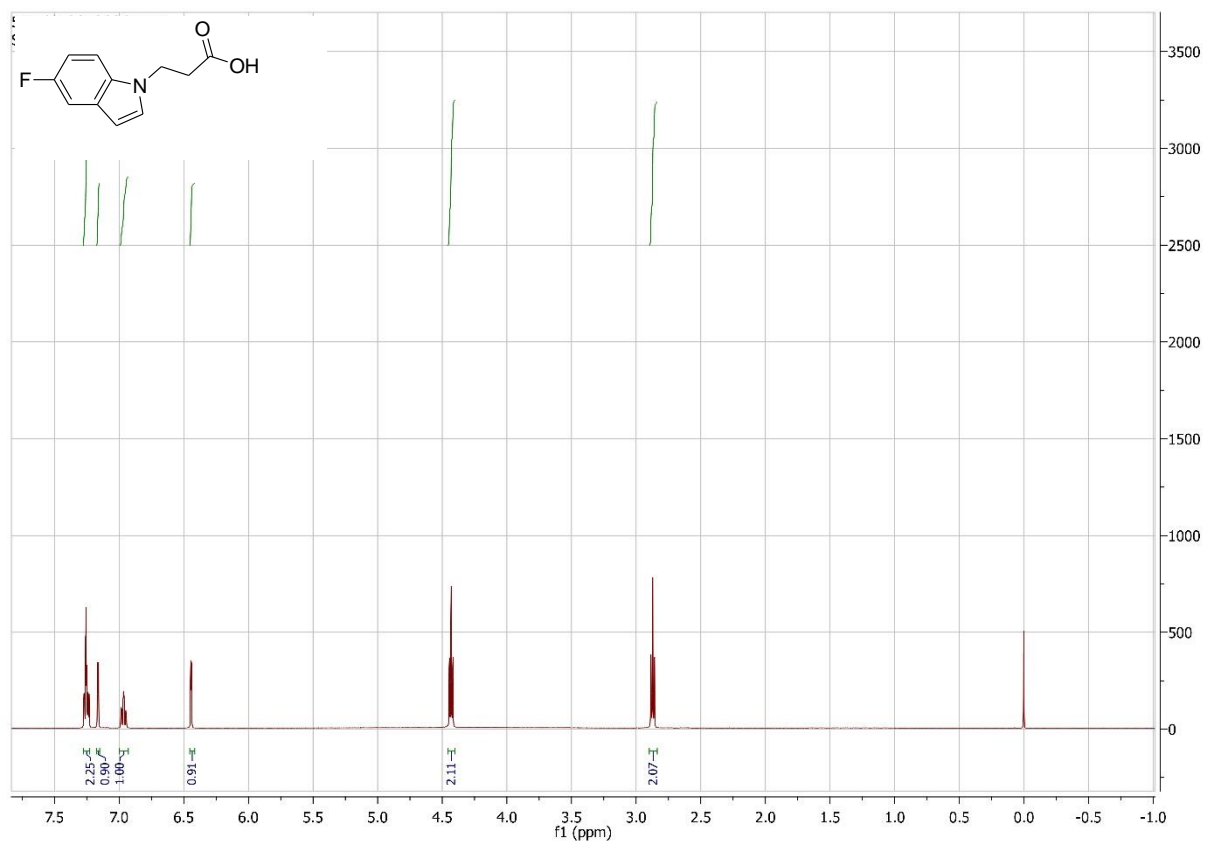

Figure S16. <sup>1</sup>H NMR spectrum of compound 21b.

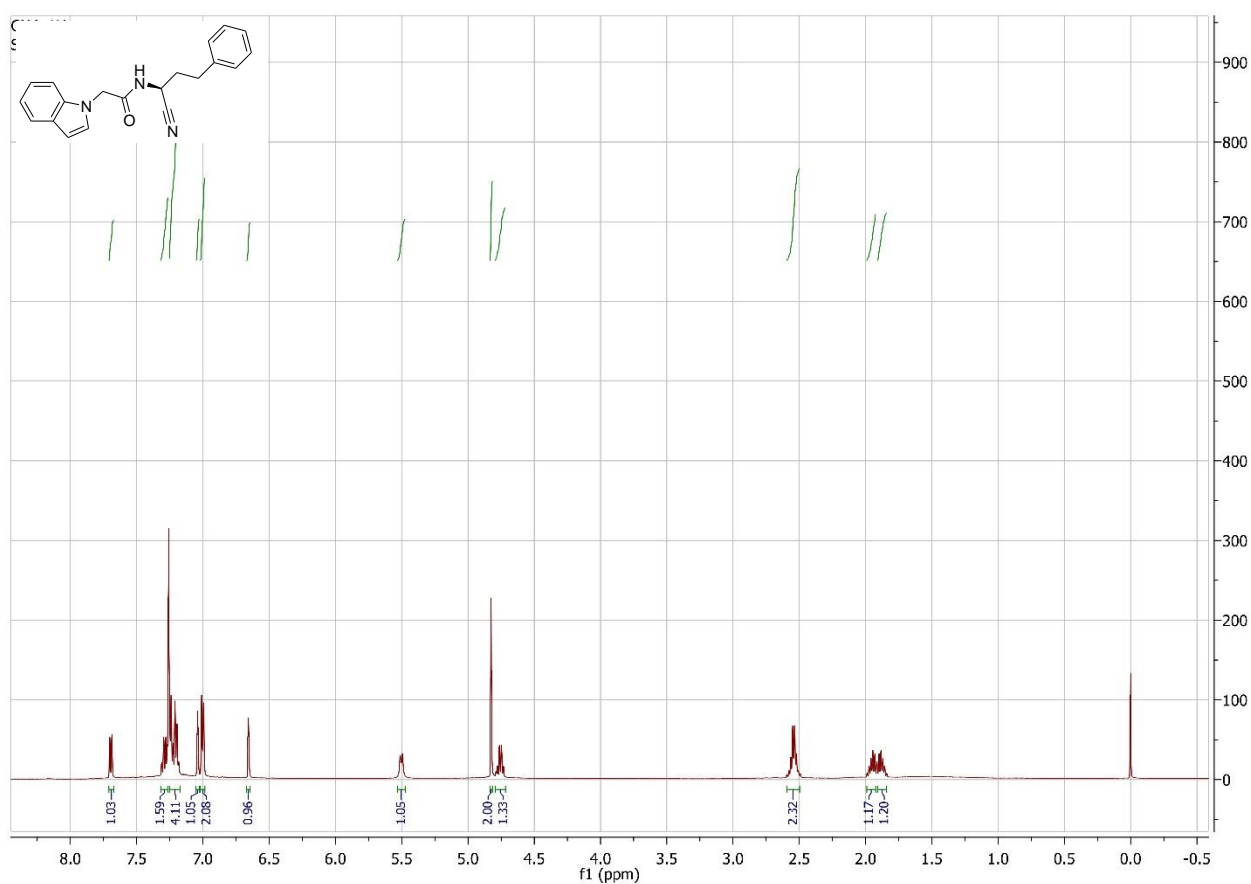

**Figure S17.** <sup>1</sup>H NMR spectrum of compound **1a**.

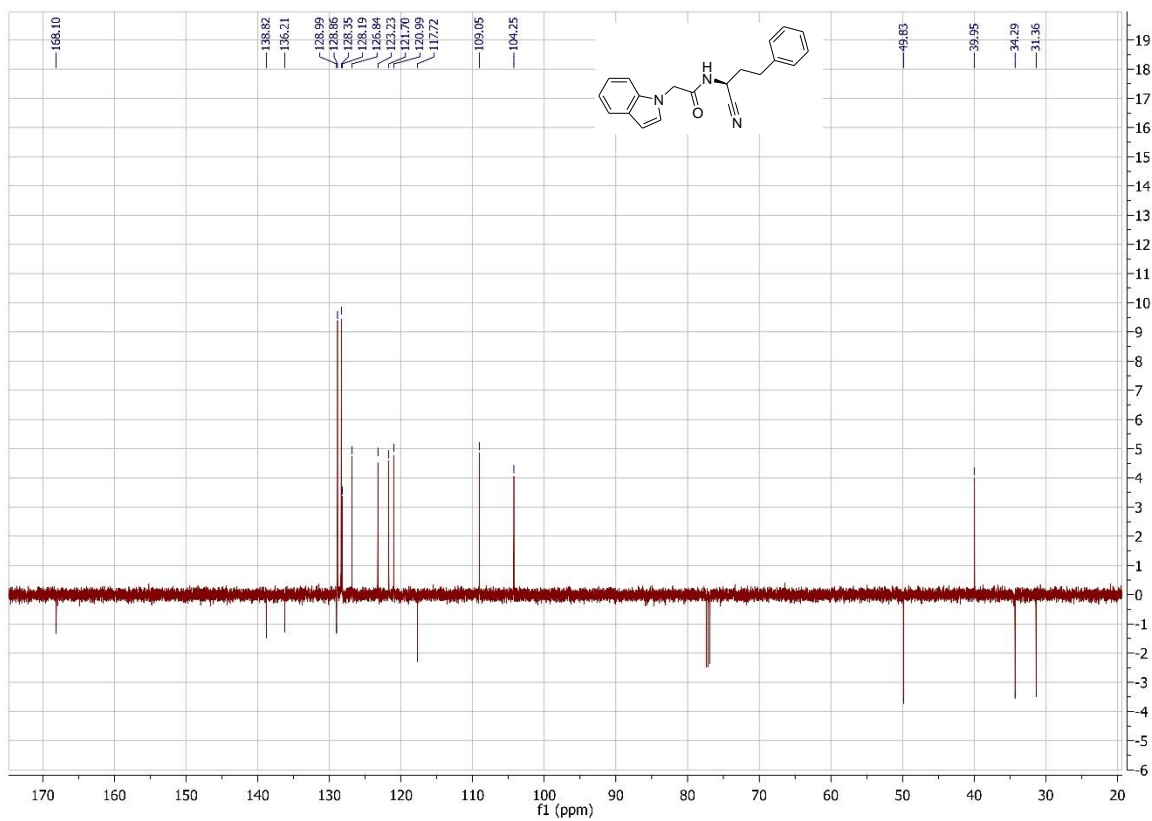

**Figure S18.** <sup>13</sup>C NMR spectrum of compound **1a**.

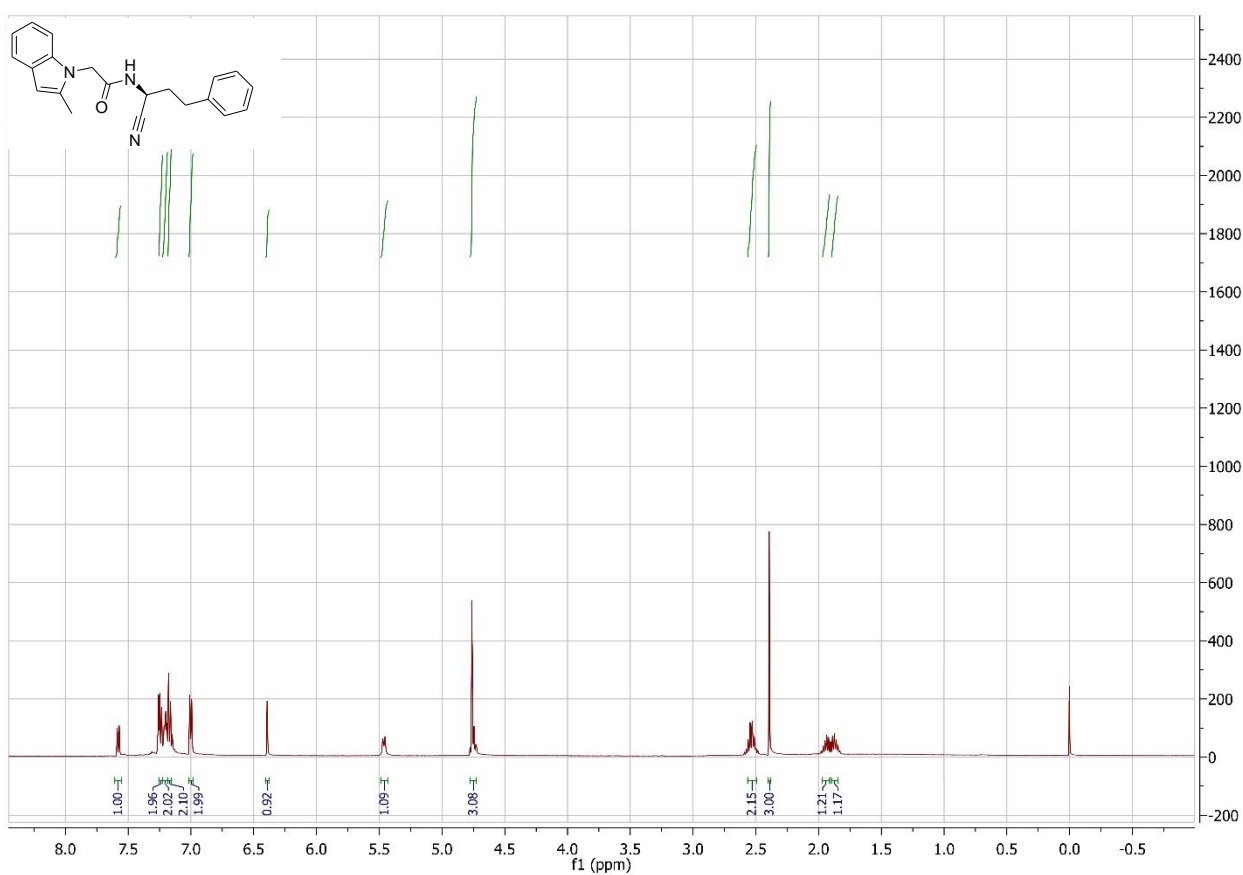

**Figure S19.** <sup>1</sup>H NMR spectrum of compound 2a.

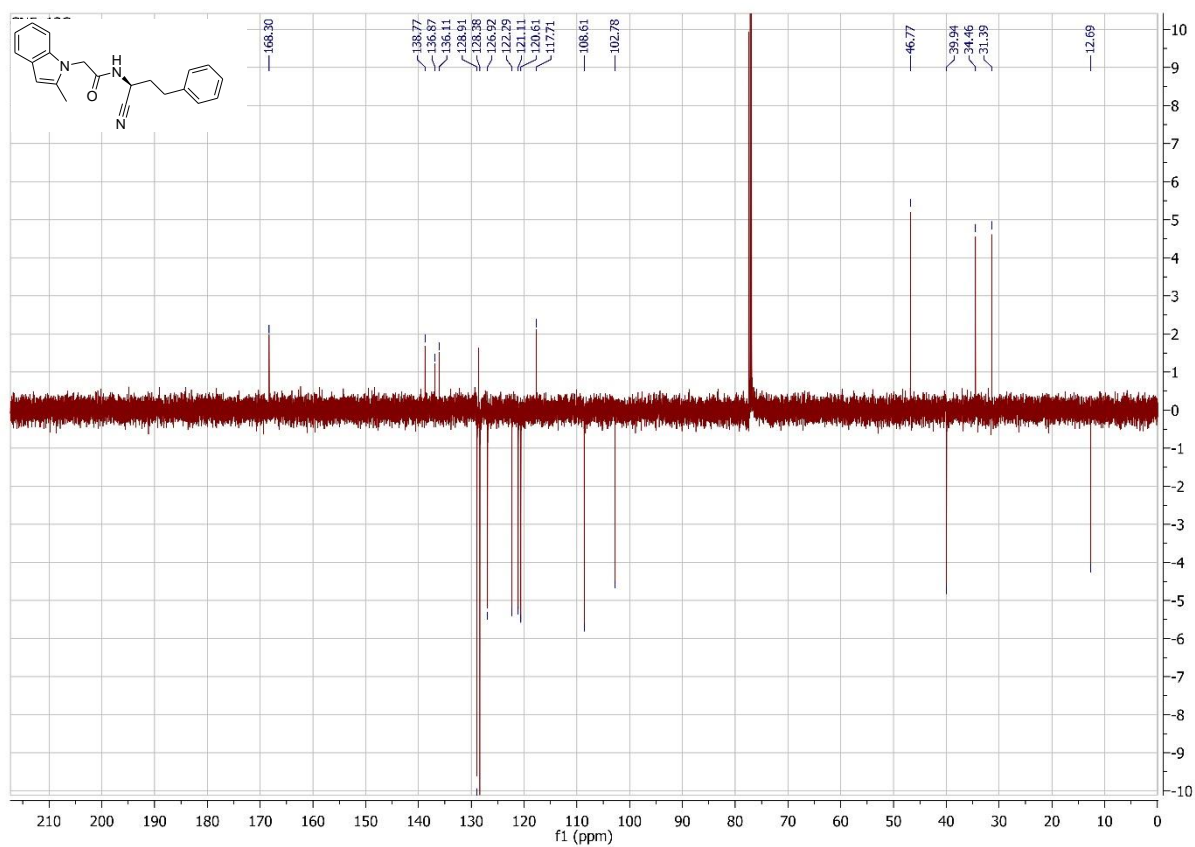

**Figure S20.** <sup>13</sup>C NMR spectrum of compound 2a.

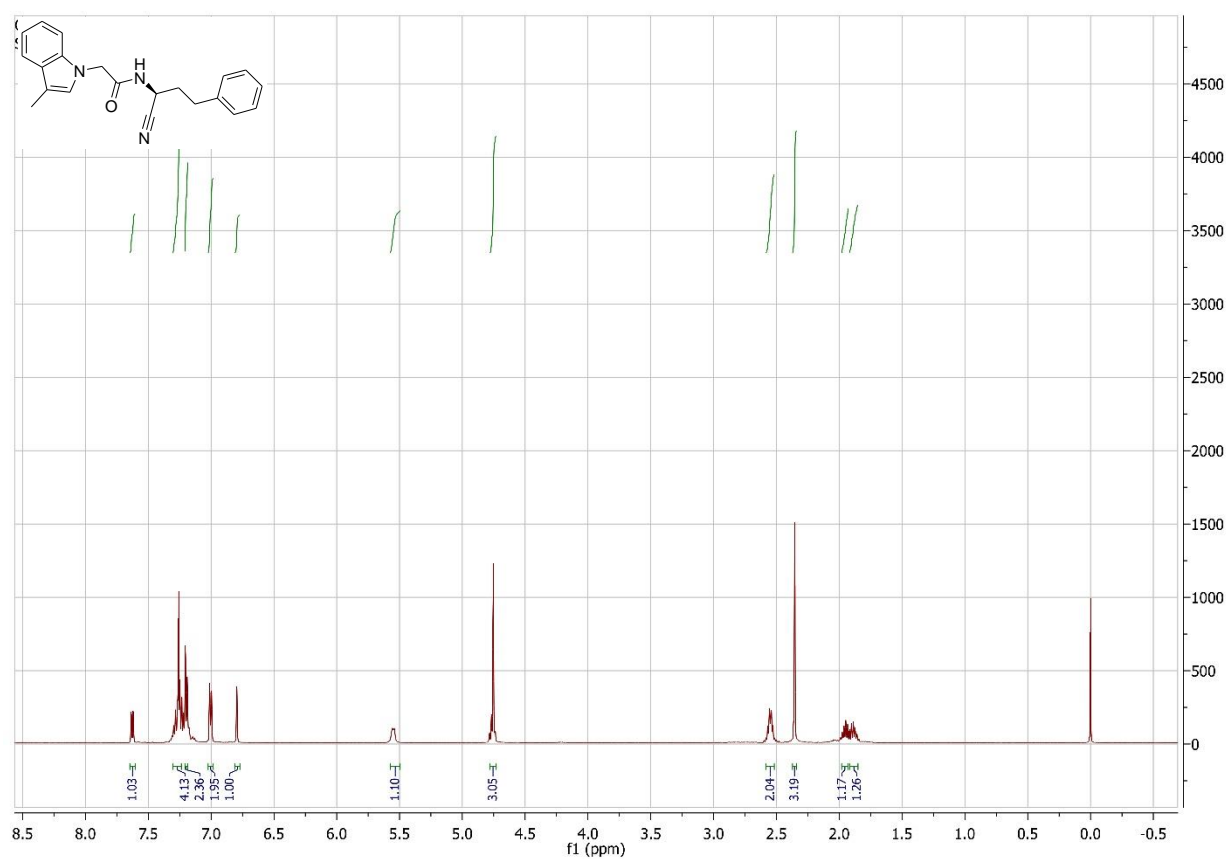

**Figure S21.** <sup>1</sup>H NMR spectrum of compound **3a**.

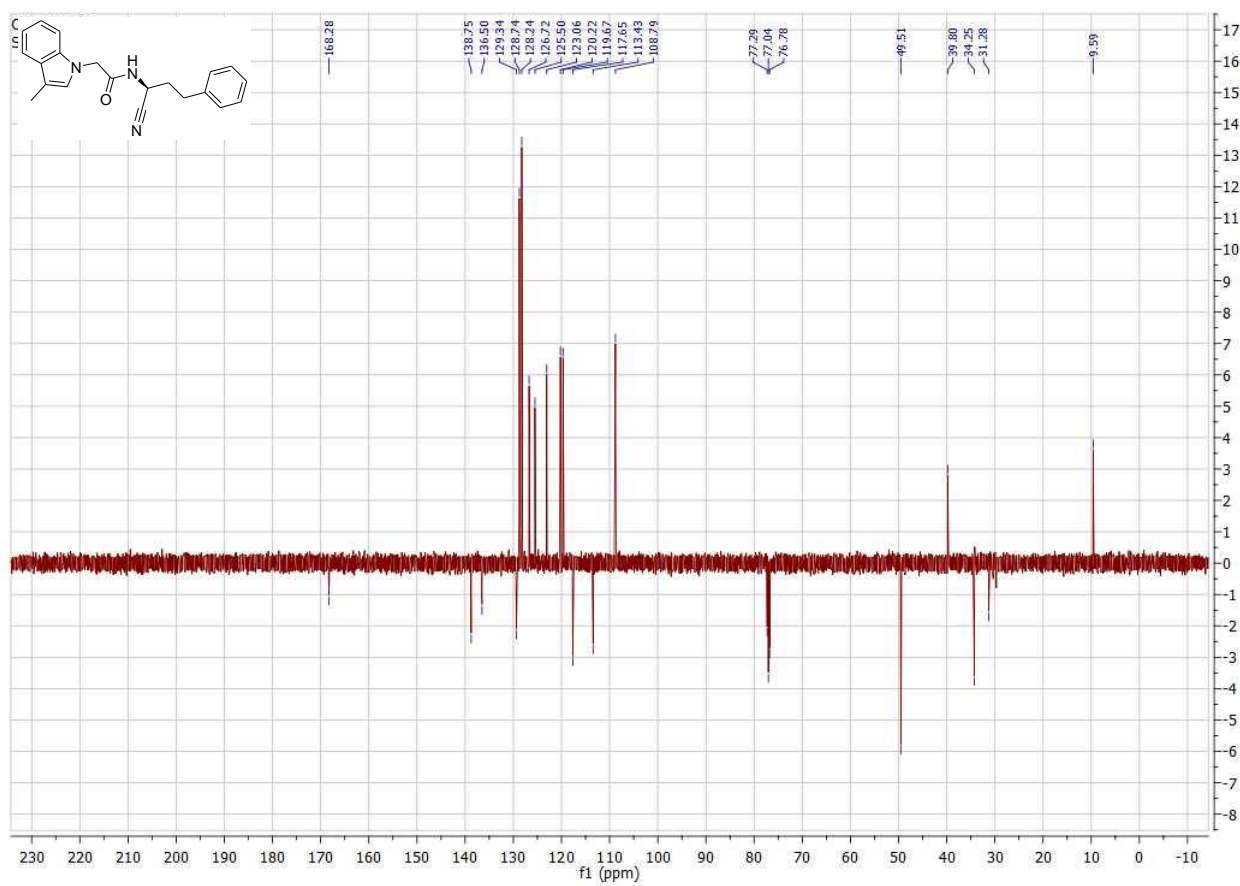

**Figure S22.** <sup>13</sup>C NMR spectrum of compound **3a**.

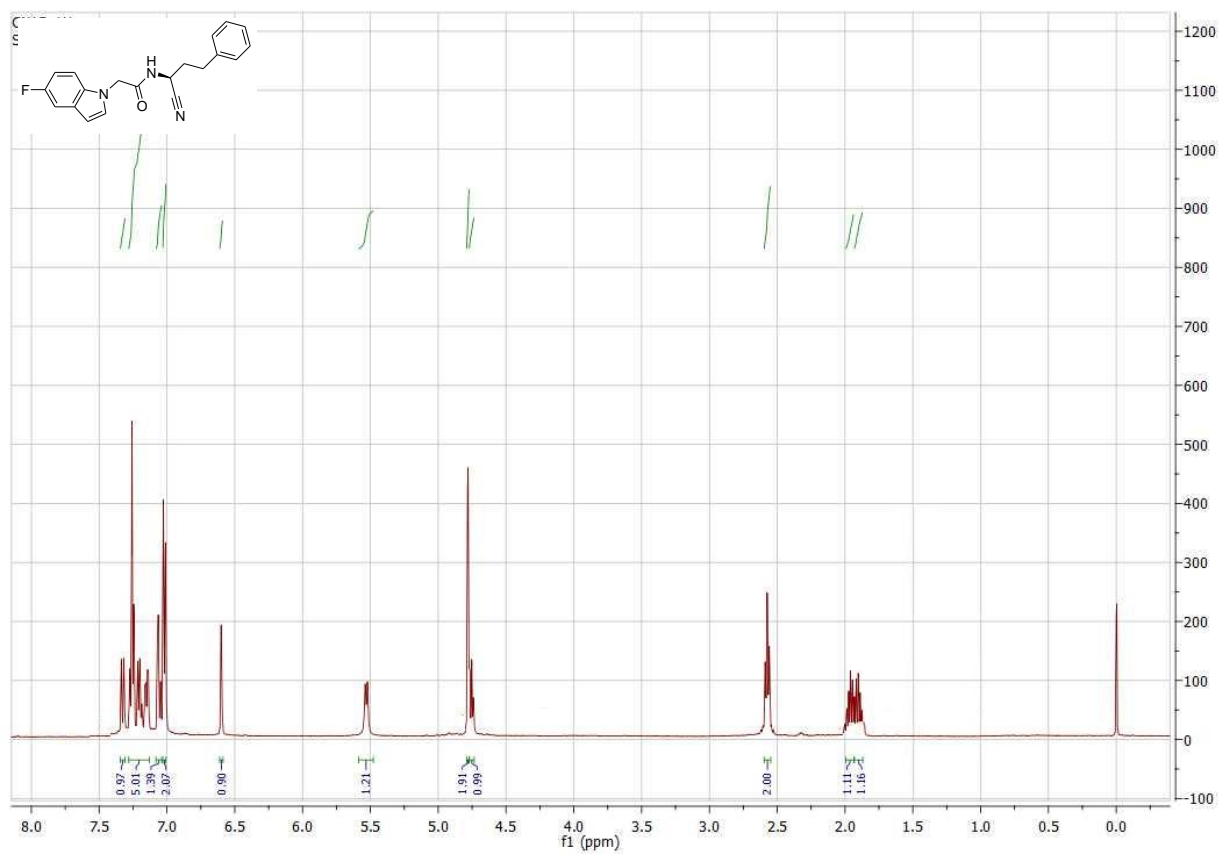

**Figure S23.** <sup>1</sup>H NMR spectrum of compound 4a.

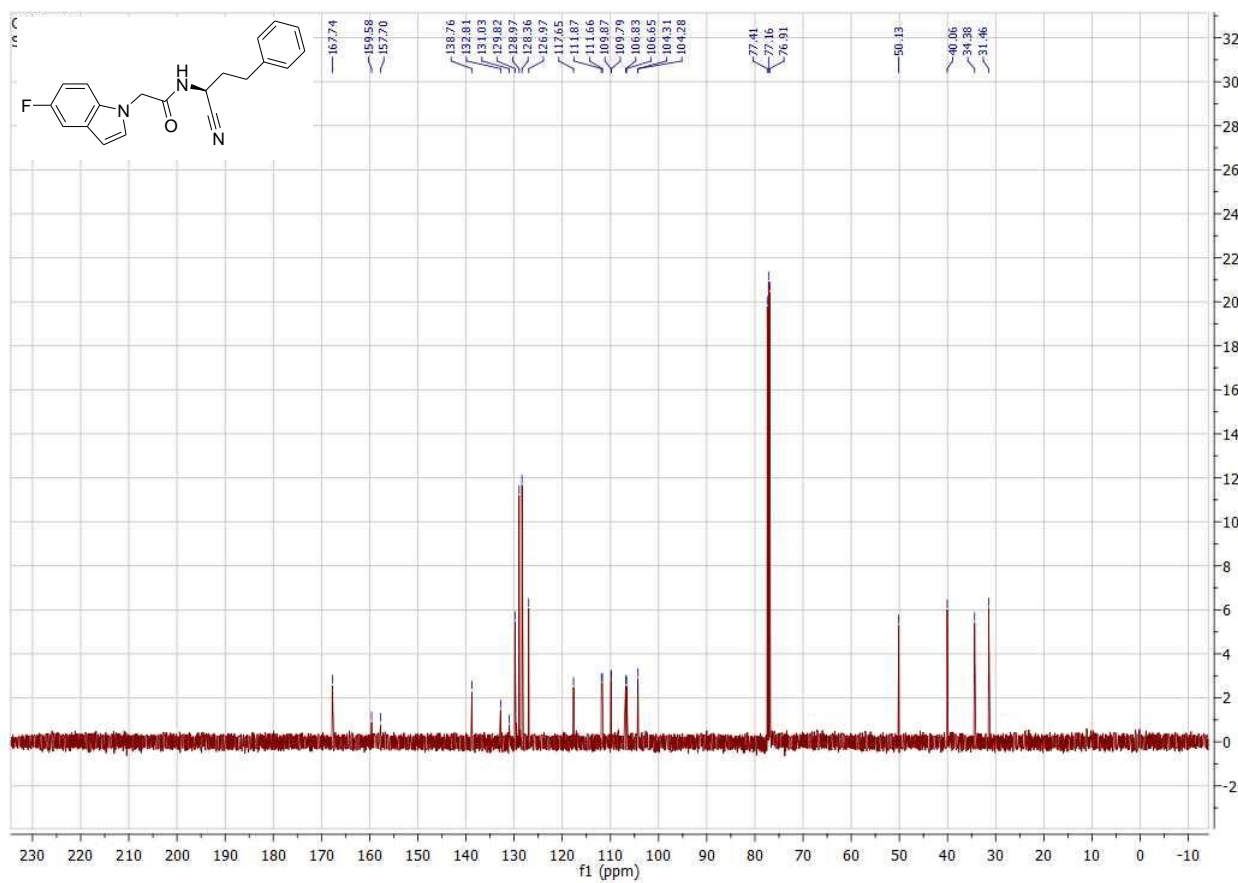

**Figure S24.** <sup>13</sup>C NMR spectrum of compound 4a.

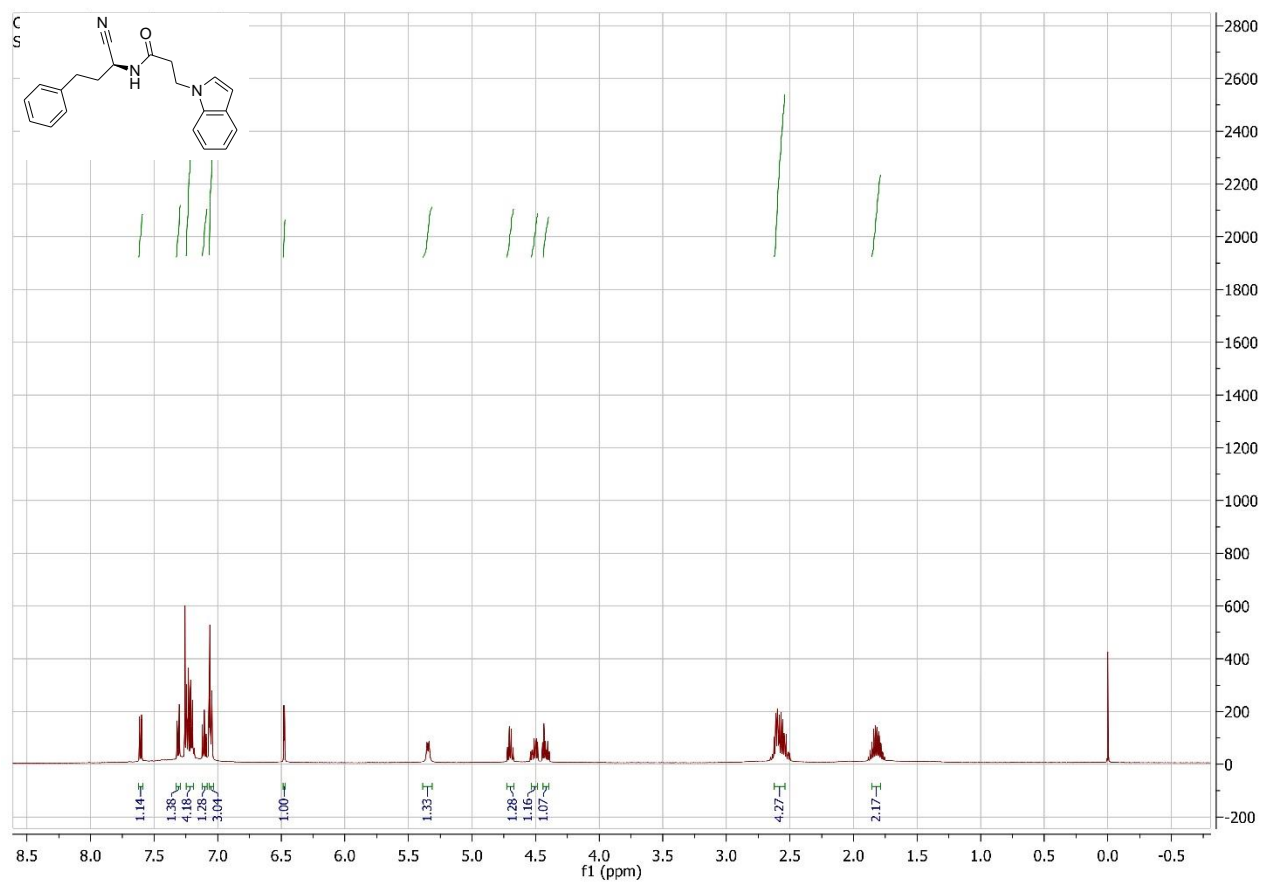

**Figure S25.** <sup>1</sup>H NMR spectrum of compound **1b**.

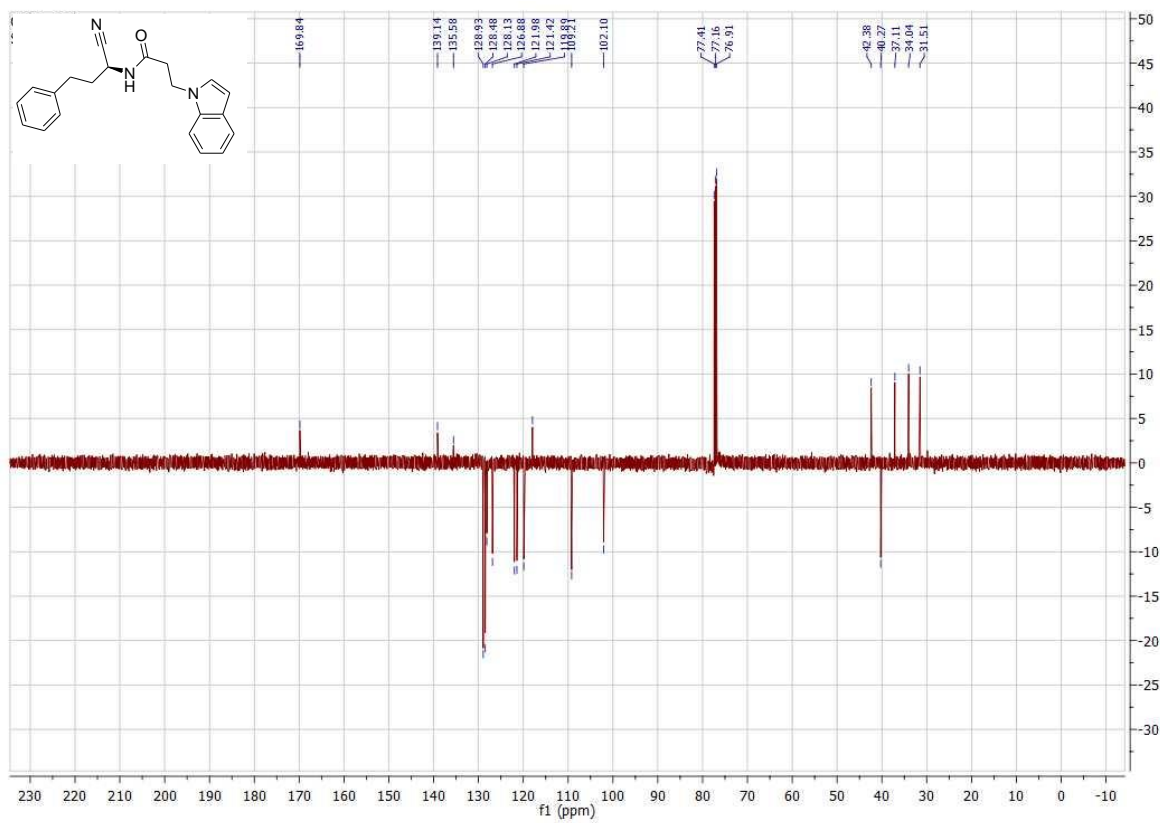

**Figure S26.** <sup>13</sup>C NMR spectrum of compound **1b**.

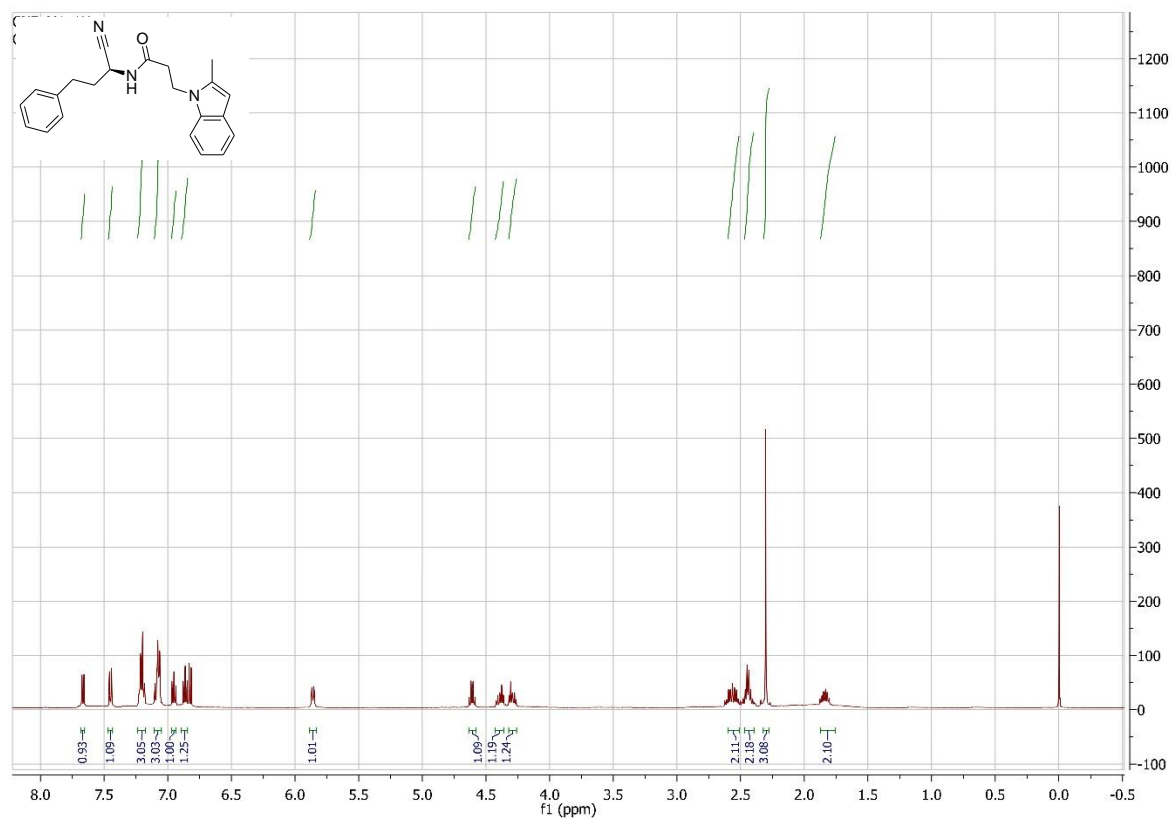

**Figure S27.** <sup>1</sup>H NMR spectrum of compound 2b.

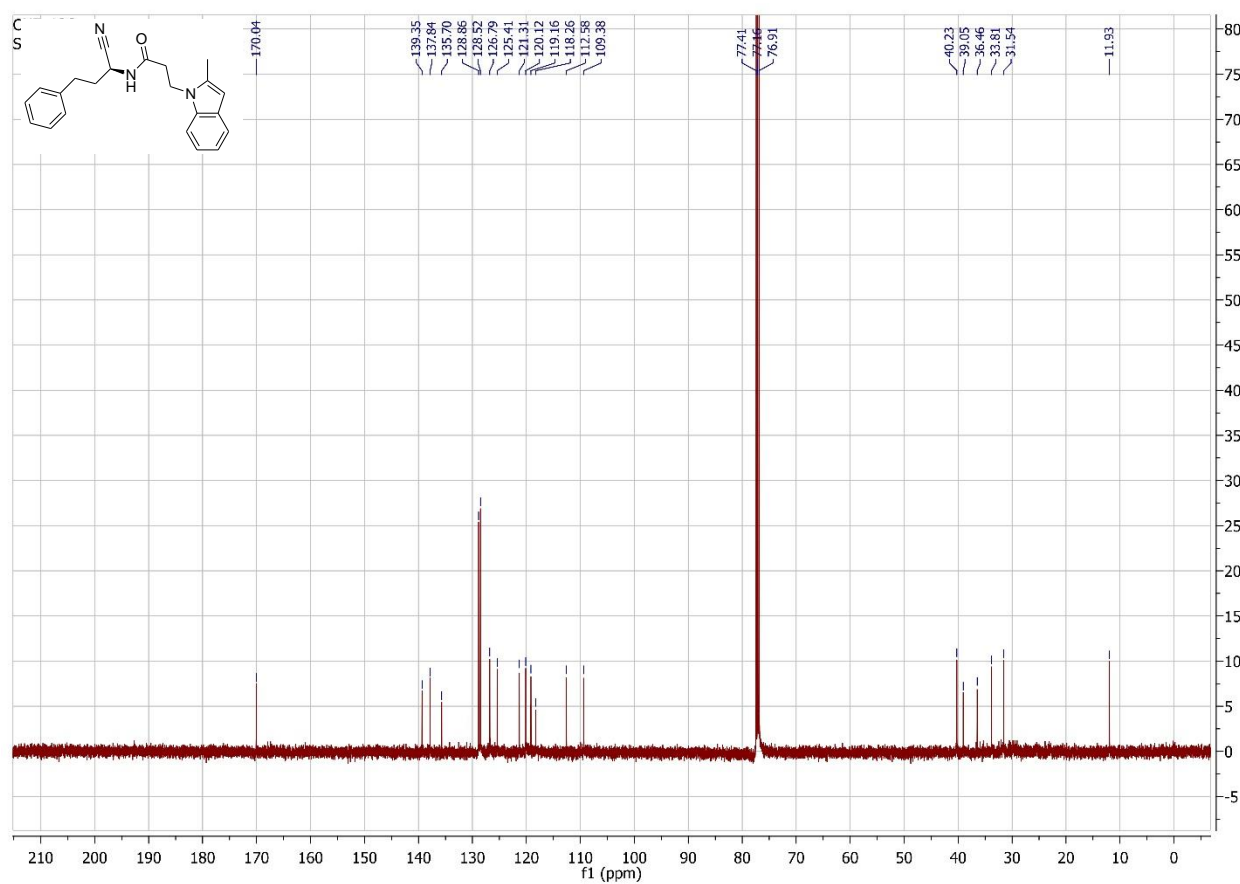

**Figure S28.** <sup>13</sup>C NMR spectrum of compound 2b.



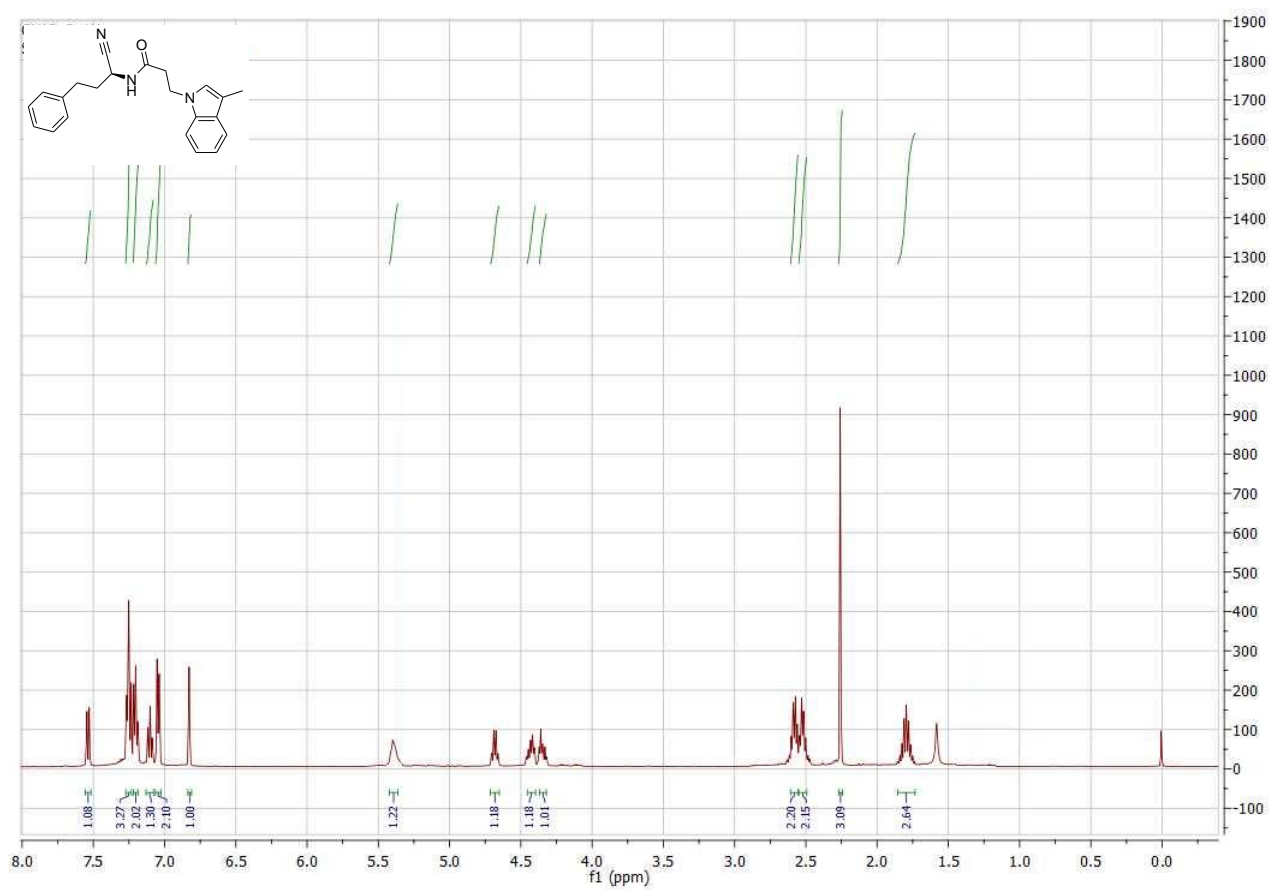

**Figure S29.** <sup>1</sup>H NMR spectrum of compound **3b**.

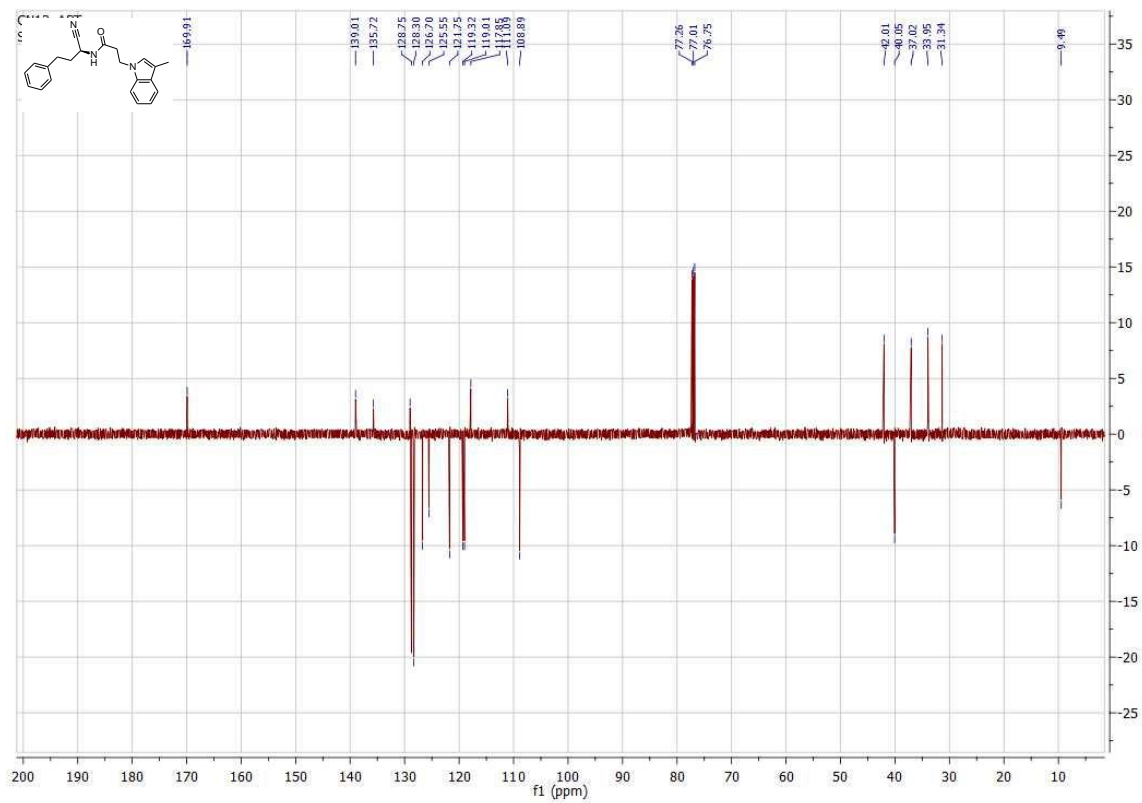

**Figure S30.** <sup>13</sup>C NMR spectrum of compound **3b**.

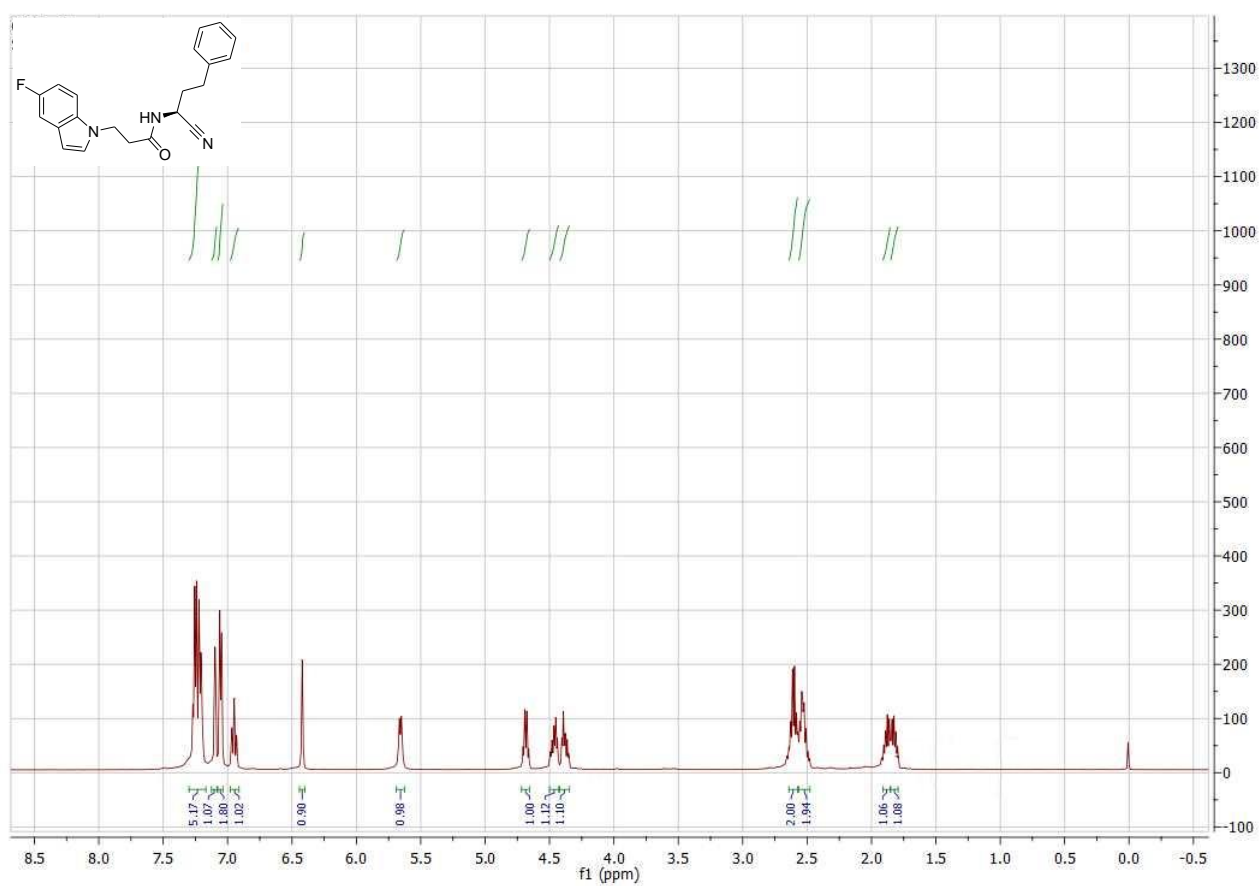

**Figure S31.** <sup>1</sup>H NMR spectrum of compound **4b**.

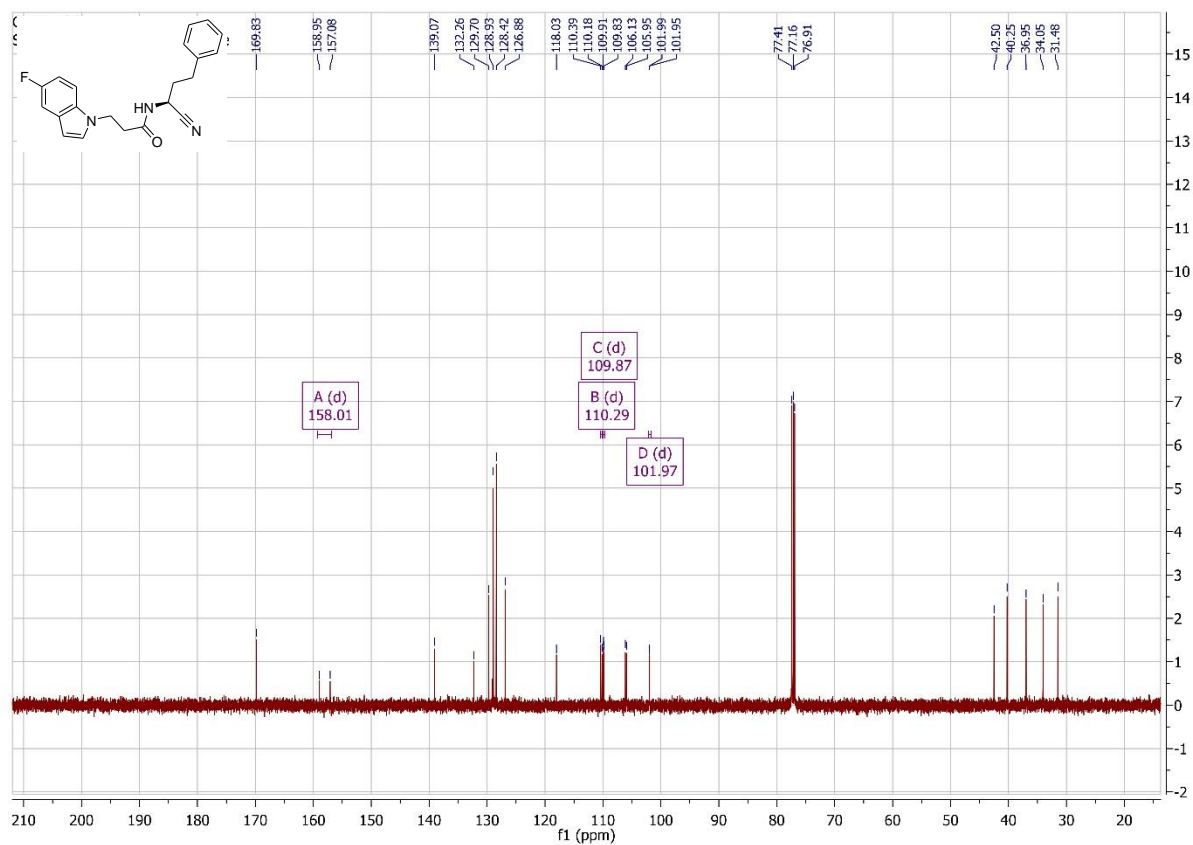

**Figure S32.** <sup>13</sup>C NMR spectrum of compound **4b**.

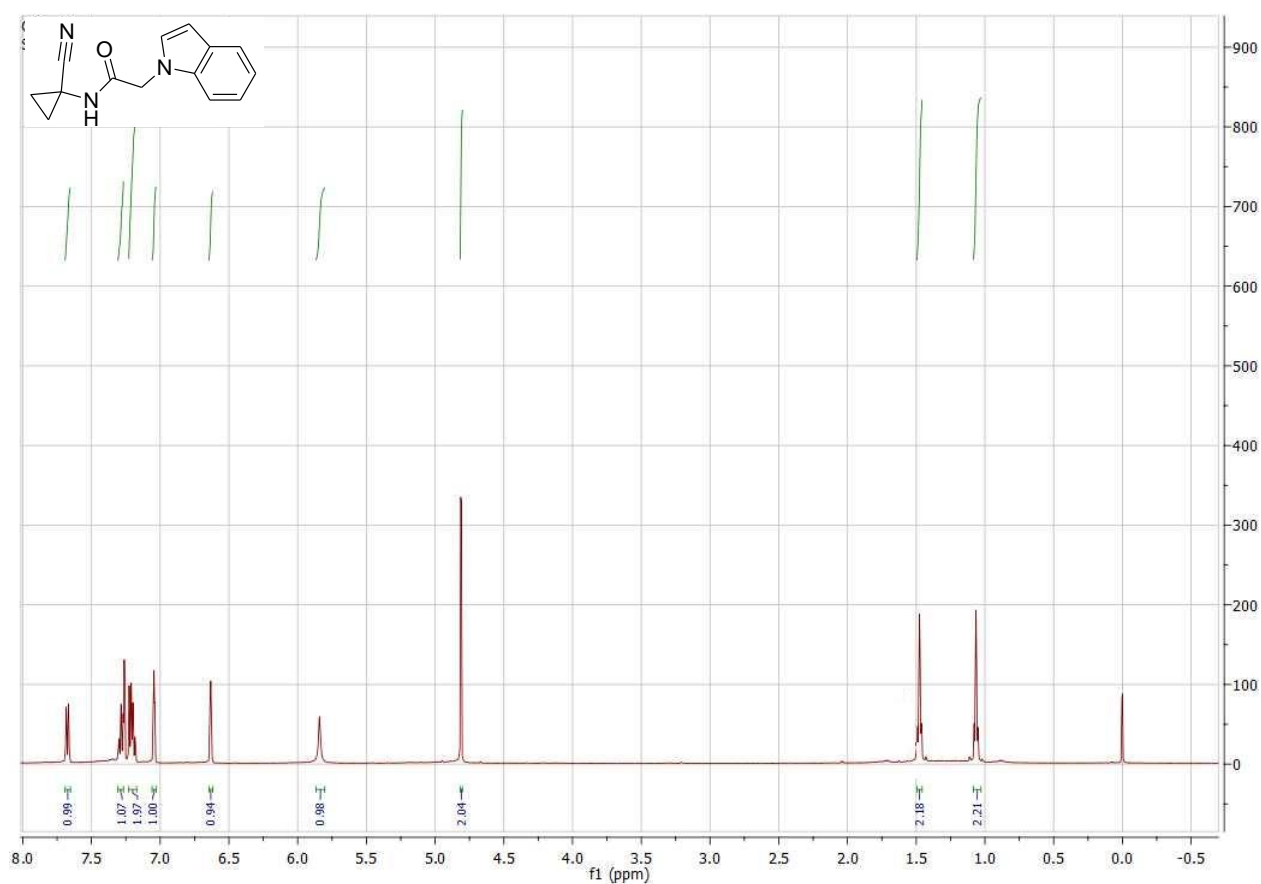

Figure S33.  $^1\text{H}$  NMR spectrum of compound **5a**.

This report was created by ACD/NMR Processor Academic Edition. For more information go to [www.acdlabs.com/nmrproc/](http://www.acdlabs.com/nmrproc/)

08/04/2024 14:51:28

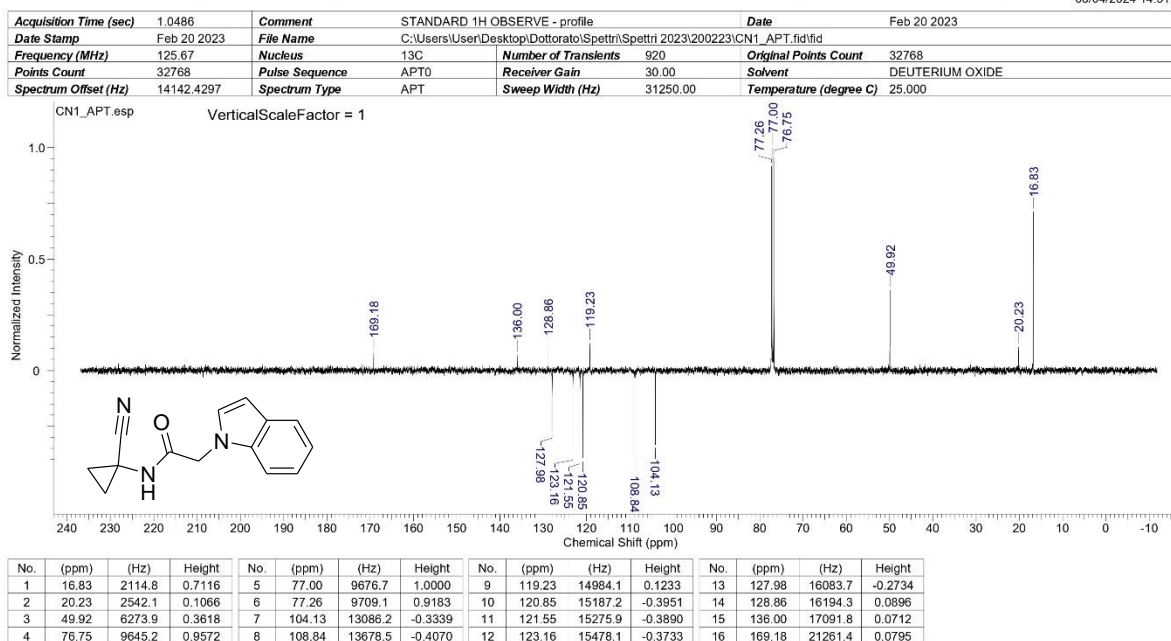

Figure S34.  $^{13}\text{C}$  NMR spectrum of compound **5a**.

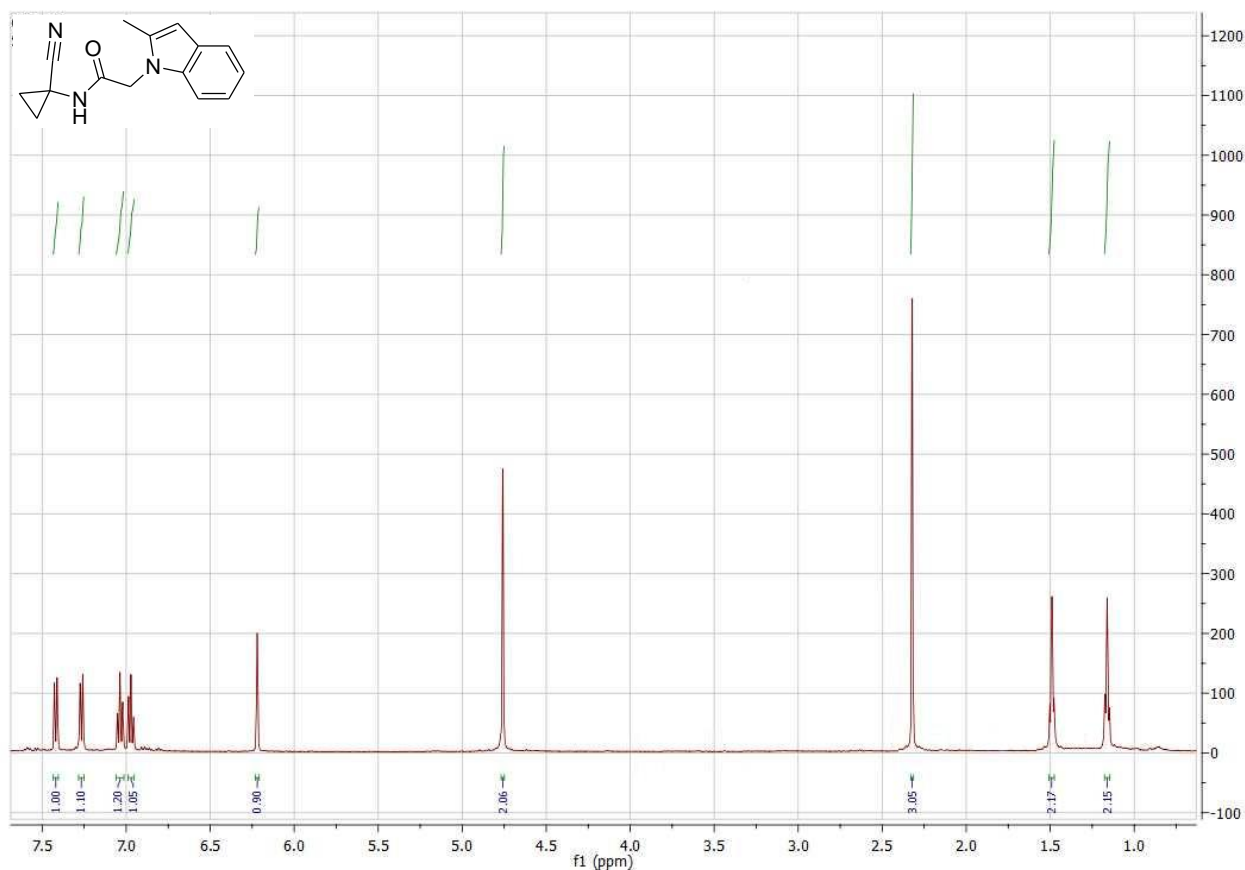

Figure S35.  $^1\text{H}$  NMR spectrum of compound **6a**.

This report was created by ACD/NMR Processor Academic Edition. For more information go to [www.acdlabs.com/nmrproc/](http://www.acdlabs.com/nmrproc/)

08/04/2024 14:33:42

|                        |            |                |                                                                        |                        |                 |
|------------------------|------------|----------------|------------------------------------------------------------------------|------------------------|-----------------|
| Acquisition Time (sec) | 1.0486     | Comment        | STANDARD 1H OBSERVE - profile                                          | Date                   | Mar 2 2023      |
| Date Stamp             | Mar 2 2023 | File Name      | C:\Users\User\Desktop\Dottrato\Spettri\Spettri 2023\020323\CN2_APT.fid |                        |                 |
| Frequency (MHz)        | 125.67     | Nucleus        | $^{13}\text{C}$                                                        | Number of Transients   | 1188            |
| Points Count           | 32768      | Pulse Sequence | APT0                                                                   | Receiver Gain          | 30.00           |
| Spectrum Offset (Hz)   | 13509.9902 | Spectrum Type  | APT                                                                    | Sweep Width (Hz)       | 31250.00        |
|                        |            |                |                                                                        | Original Points Count  | 32768           |
|                        |            |                |                                                                        | Solvent                | DEUTERIUM OXIDE |
|                        |            |                |                                                                        | Temperature (degree C) | 25.000          |

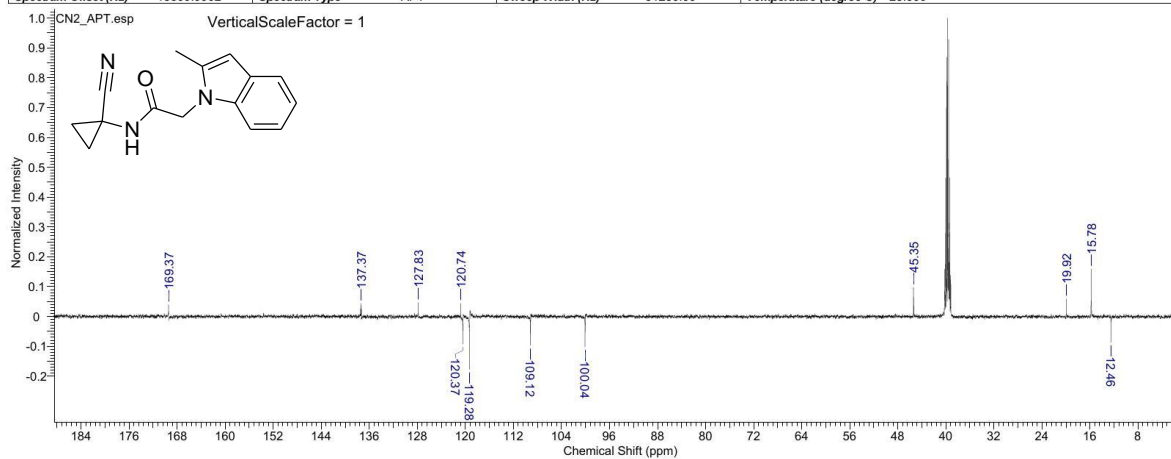

| No. | (ppm) | (Hz)   | Height  | No. | (ppm)  | (Hz)    | Height  | No. | (ppm)  | (Hz)    | Height  | No. | (ppm)  | (Hz)    | Height |
|-----|-------|--------|---------|-----|--------|---------|---------|-----|--------|---------|---------|-----|--------|---------|--------|
| 1   | 12.46 | 1565.3 | -0.0873 | 4   | 45.35  | 5699.6  | 0.0970  | 7   | 119.28 | 14989.7 | -0.1780 | 10  | 127.83 | 16064.5 | 0.0466 |
| 2   | 15.78 | 1983.1 | 0.1582  | 5   | 100.04 | 12572.0 | -0.1030 | 8   | 120.37 | 15127.0 | -0.0933 | 11  | 137.32 | 17257.6 | 0.0259 |
| 3   | 19.92 | 2503.8 | 0.0588  | 6   | 109.12 | 13713.6 | -0.0975 | 9   | 120.74 | 15173.7 | 0.0437  | 12  | 137.37 | 17263.3 | 0.0430 |

Figure S36.  $^{13}\text{C}$  NMR spectrum of compound **6a**.

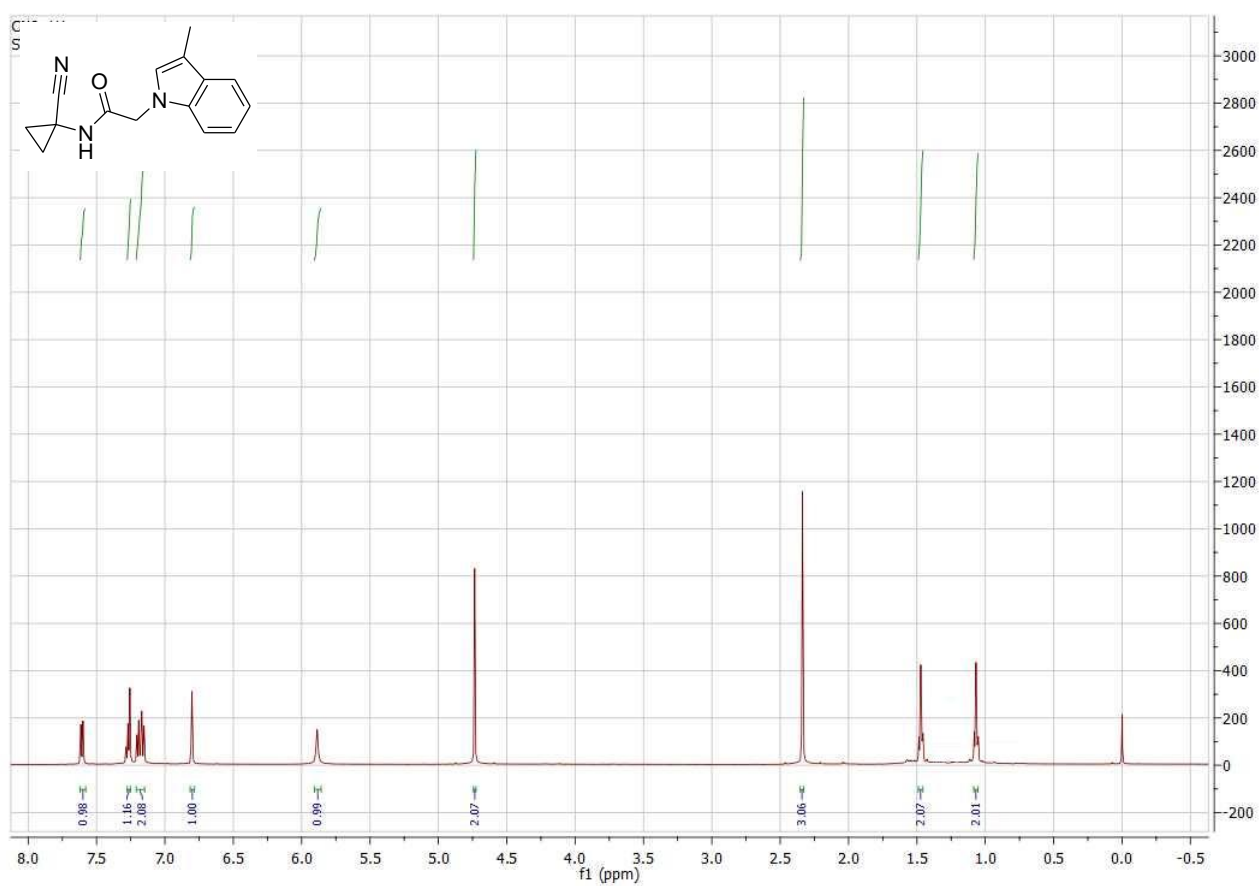

**Figure S37.** <sup>1</sup>H NMR spectrum of compound **7a**.

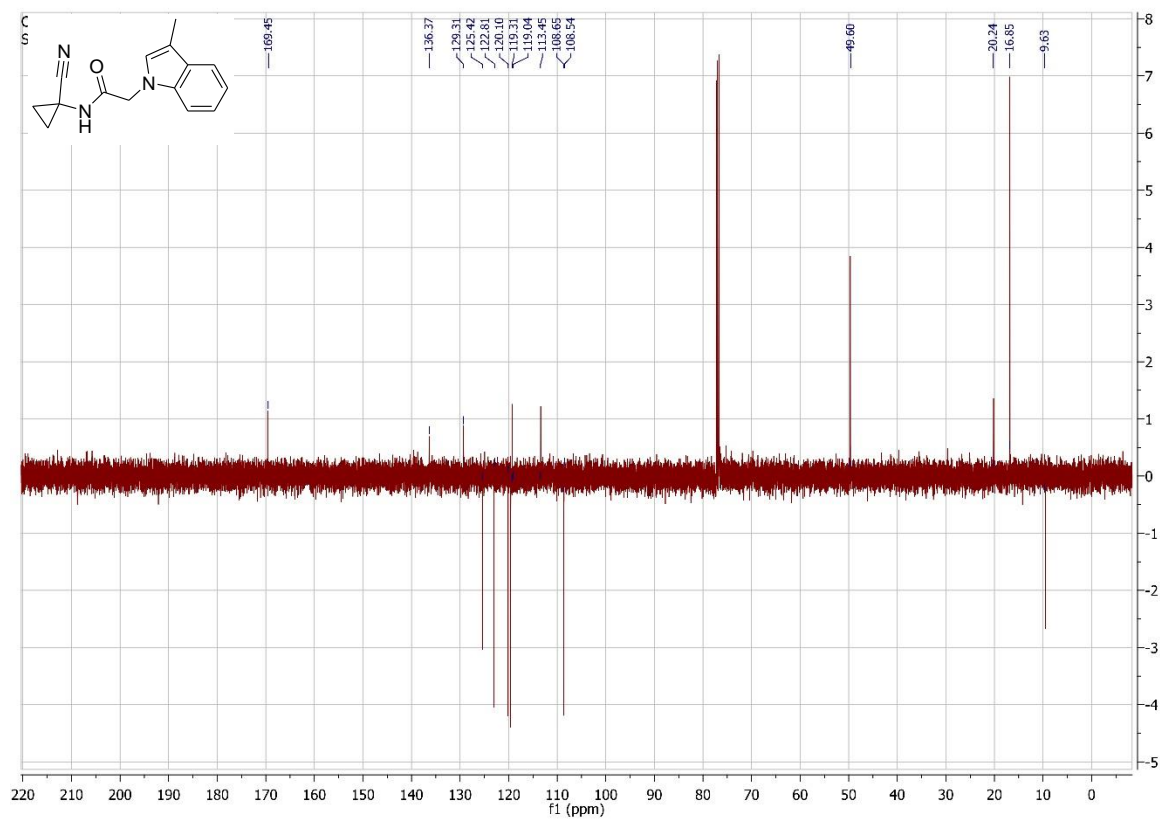

**Figure S38.** <sup>13</sup>C NMR spectrum of compound **7a**.

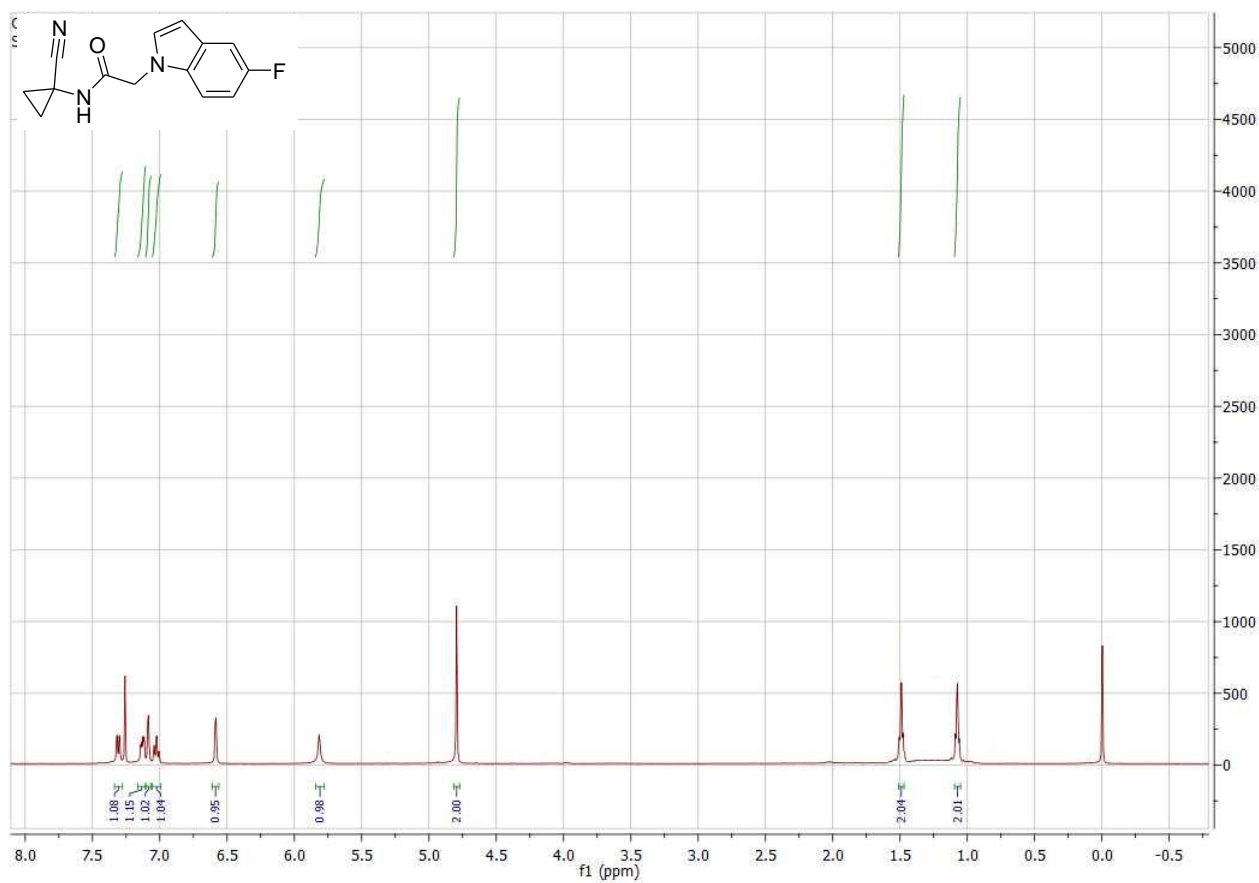

**Figure S39.** <sup>1</sup>H NMR spectrum of compound **8a**.

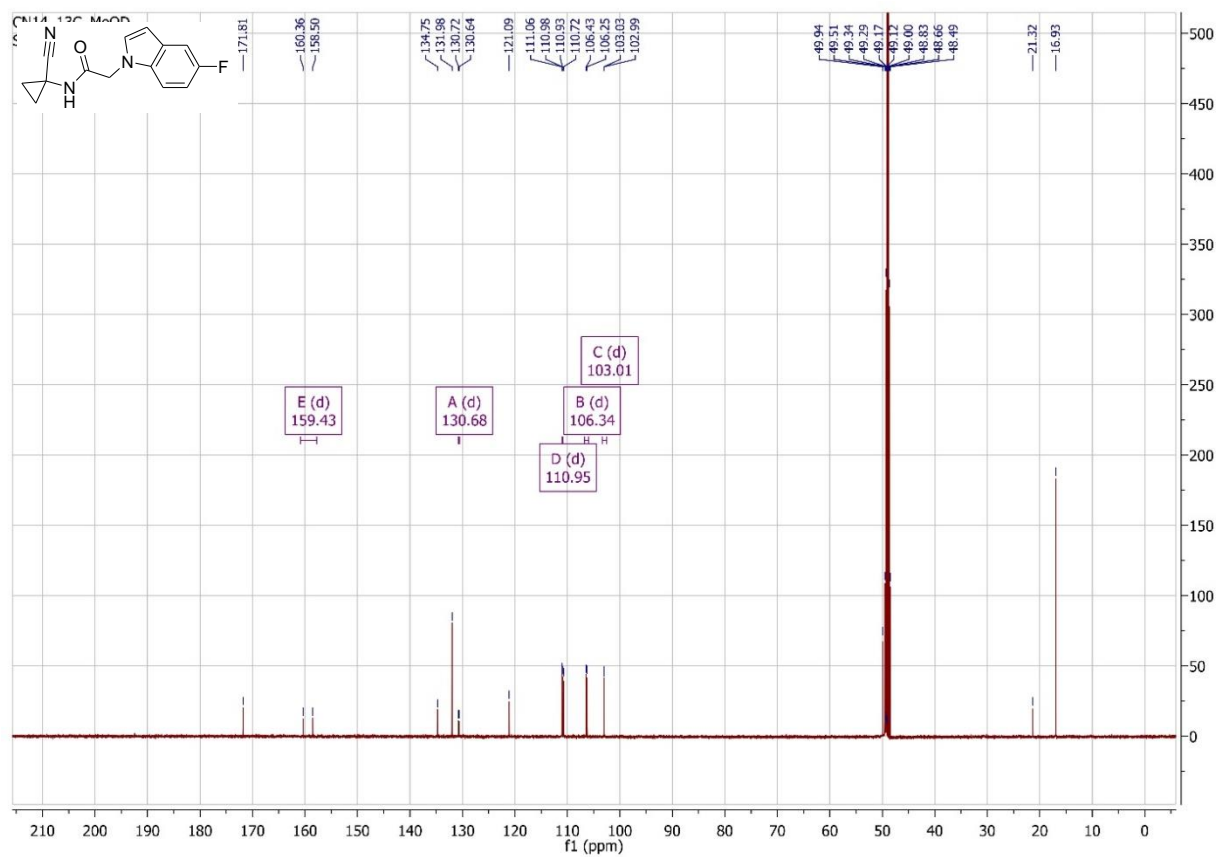

**Figure S40.** <sup>13</sup>C NMR spectrum of compound **8a**.

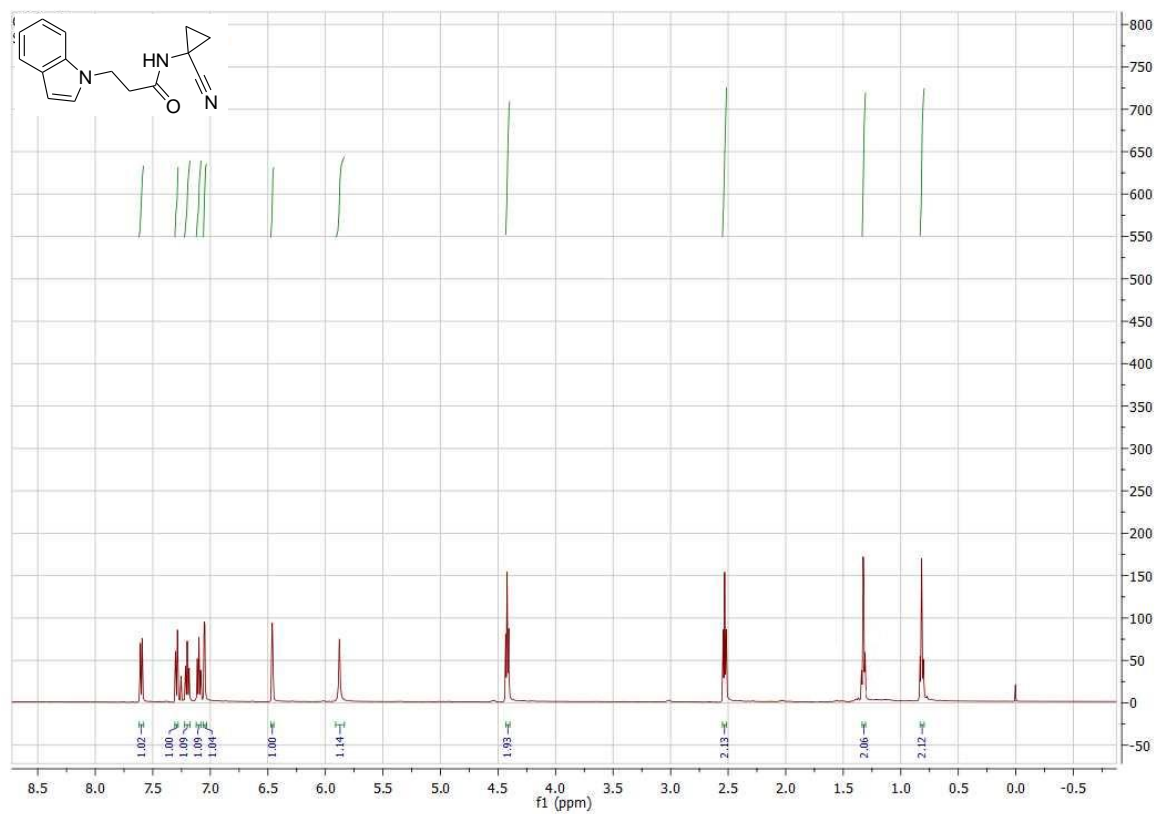

**Figure S41.** <sup>1</sup>H NMR spectrum of compound **5b**.

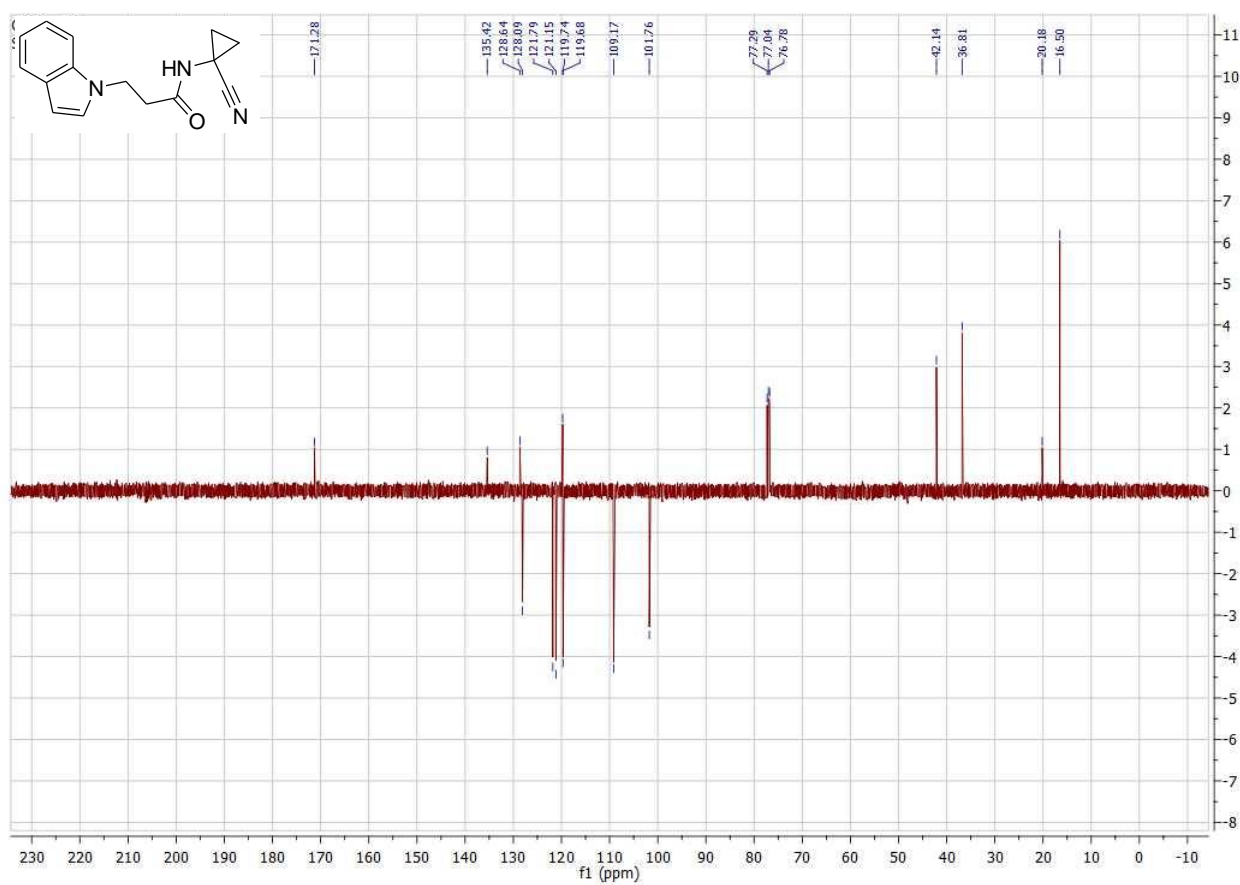

**Figure S42.** <sup>13</sup>C NMR spectrum of compound **5b**.



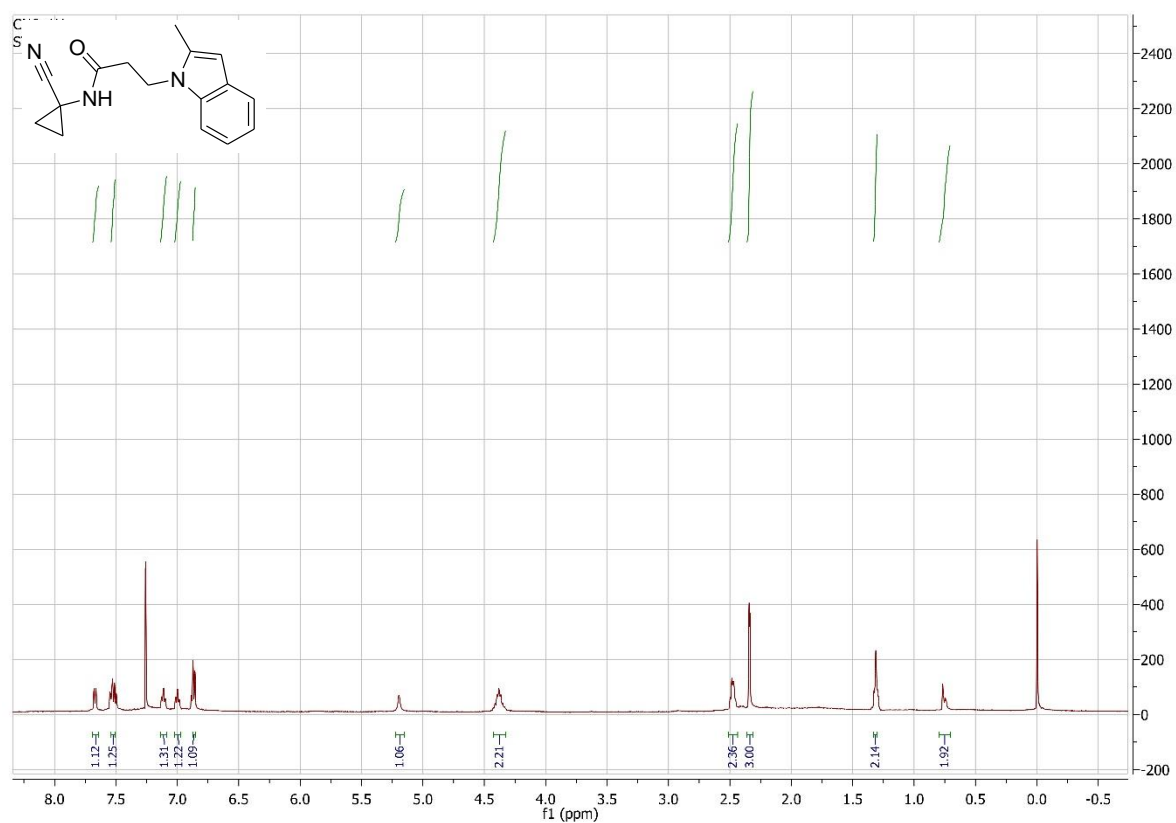

**Figure S43.** <sup>1</sup>H NMR spectrum of compound **6b**.

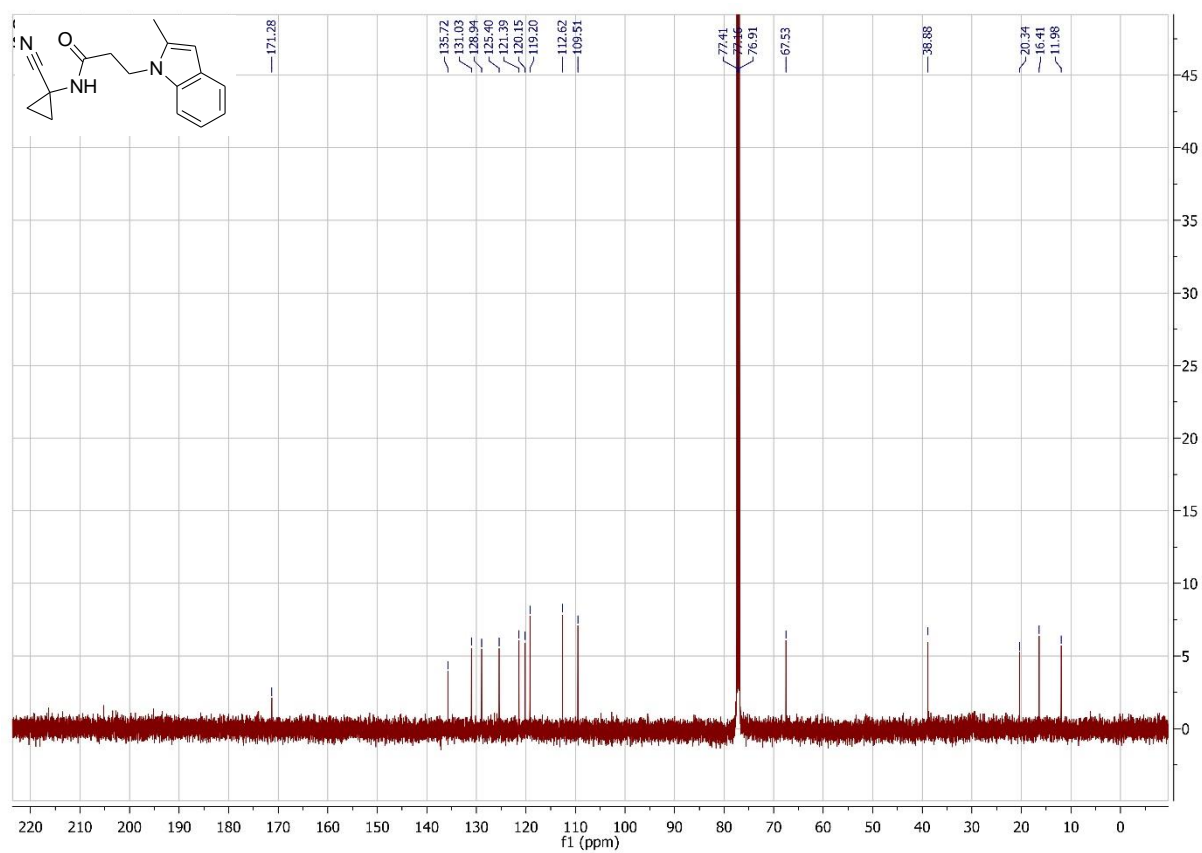

**Figure S44.** <sup>13</sup>C NMR spectrum of compound **6b**.



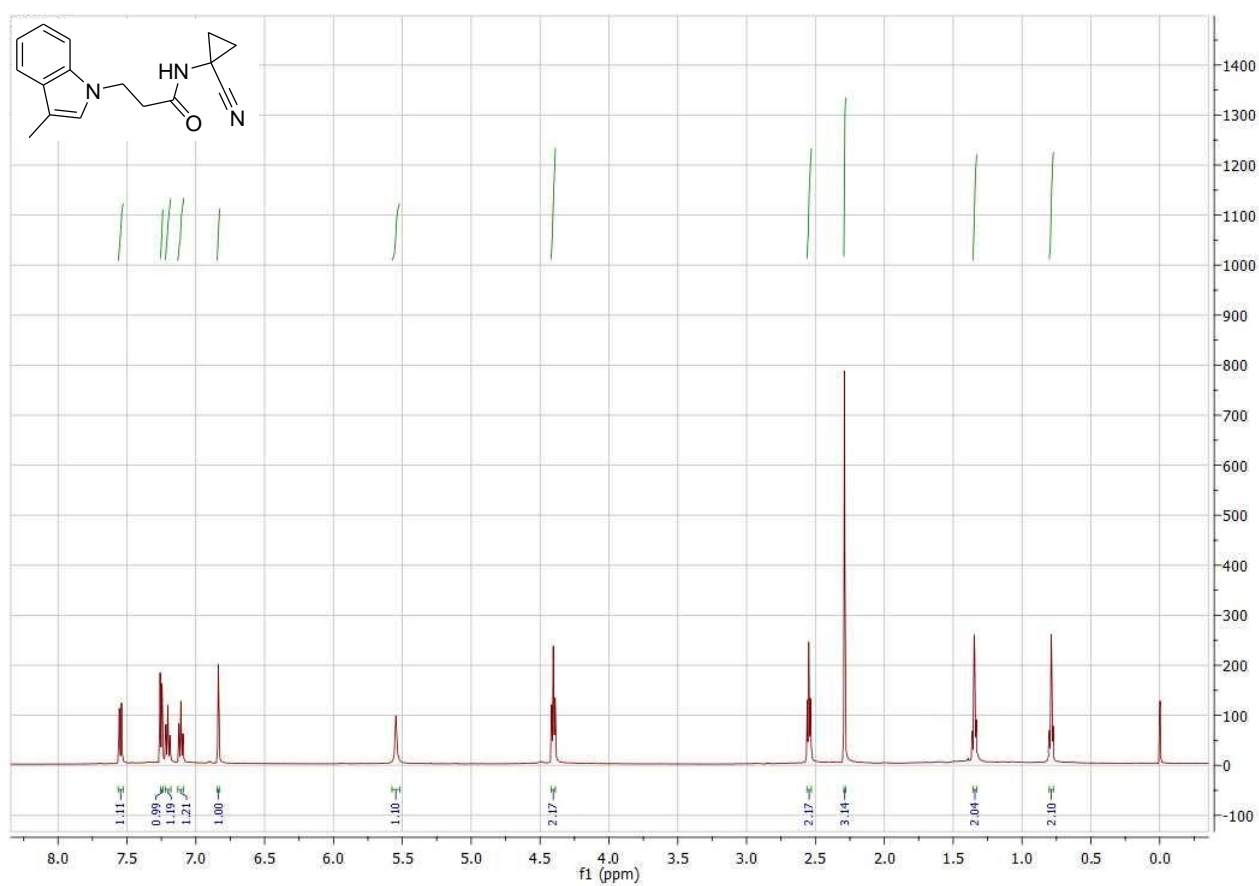

**Figure S45.** <sup>1</sup>H NMR spectrum of compound **7b**.

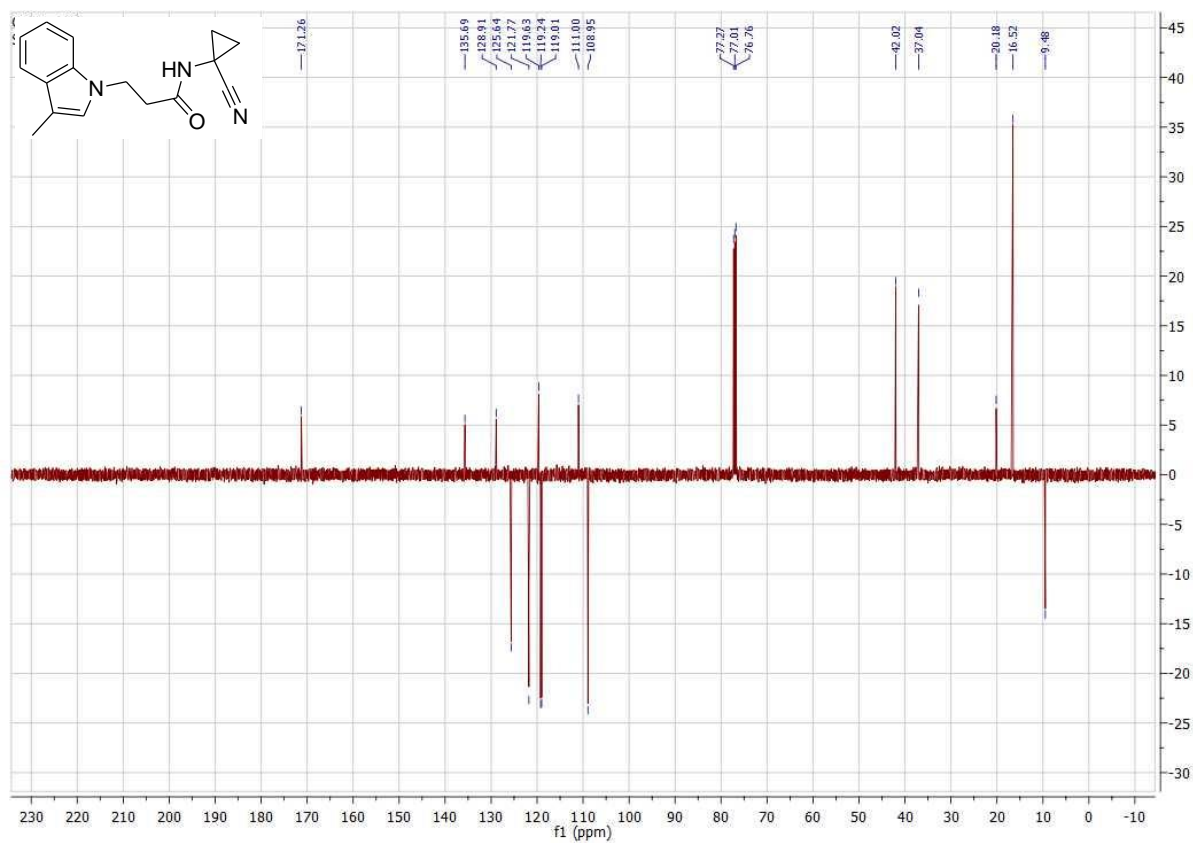

**Figure S46.** <sup>13</sup>C NMR spectrum of compound **7b**.

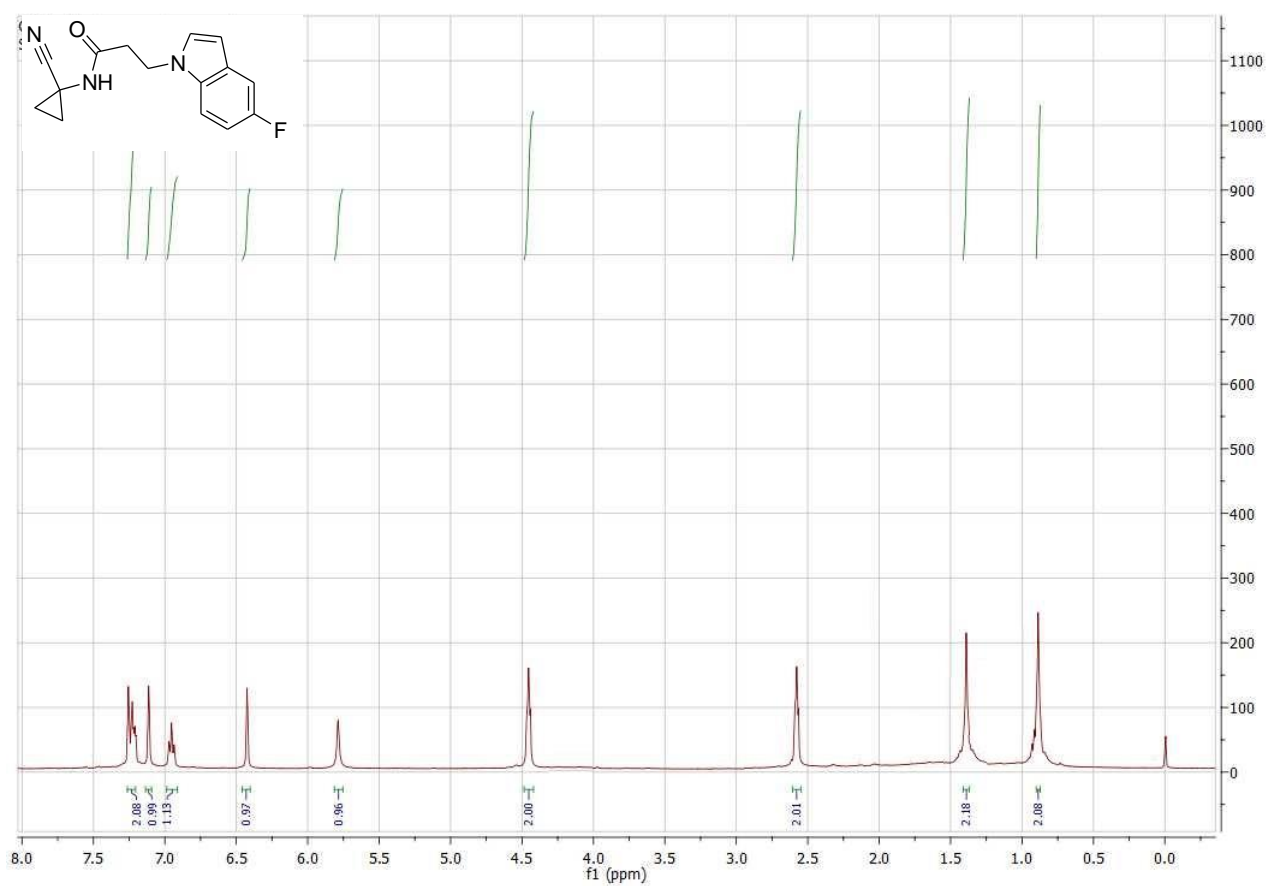

**Figure S47.** <sup>1</sup>H NMR spectrum of compound **8b**.

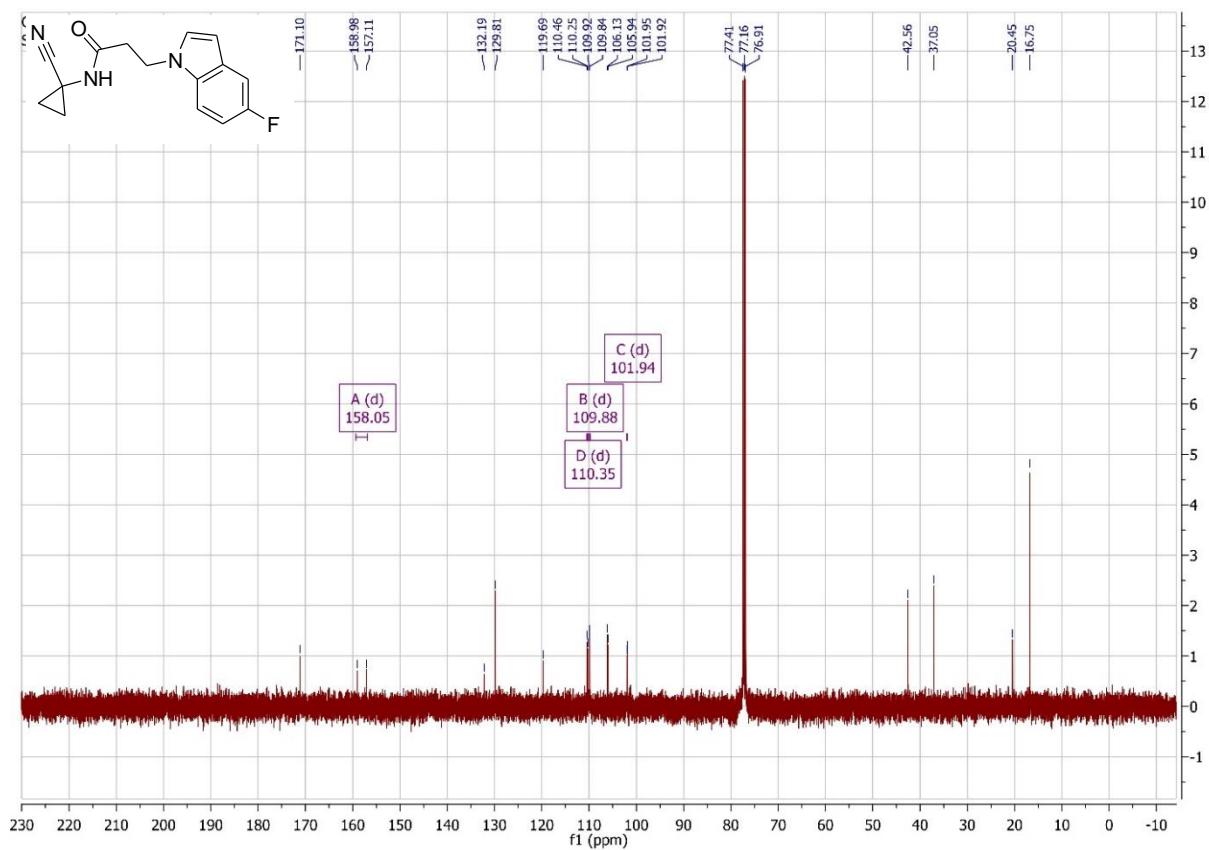

**Figure S48.** <sup>13</sup>C NMR spectrum of compound **8b**.
